# Supplementary material for: Comprehensive analysis of trihelix genes and their expression under biotic and abiotic stresses in Populus trichocarpa
Source: PubMed Central journal article supplement (PMC5080644; doi:10.1038/srep36274), 2016-10-26
Supplement: srep36274-s1.pdf [file srep36274-s1.pdf]

**Comprehensive analysis of trihelix genes and their expression under biotic and abiotic stresses in**

***Populus trichocarpa***

Zhanchao Wang<sup>1&</sup>, Quangang Liu<sup>1&</sup>, Hanzeng Wang<sup>1</sup>, Haizhen Zhang<sup>1</sup>, Xuemei Xu<sup>2</sup>, Chenghao Li<sup>1\*</sup>,  
Chuanping Yang<sup>1\*</sup>

<sup>1</sup>State Key Laboratory of Tree Genetics and Breeding, Northeast Forestry University, 26 Hexing Road,  
Harbin 150040, China (e-mail: [jjajia900325@126.com](mailto:jjajia900325@126.com); [liuquangang007@126.com](mailto:liuquangang007@126.com);  
[15526935551@163.com](mailto:15526935551@163.com); [snowsun04006@hotmail.com](mailto:snowsun04006@hotmail.com));

<sup>2</sup>Library of Northeast Forestry University, 26 Hexing Road, Harbin 150040, China (e-mail:  
[chli0@daum.net](mailto:chli0@daum.net))

\*Corresponding author (e-mail: [chli0@163.com](mailto:chli0@163.com); [yangchuanpingnefu@163.com](mailto:yangchuanpingnefu@163.com)).

&These authors contributed equally to this work as co-first authors.

Supplementary Figure S1. Multiple sequence alignment of trihelix genes in *Populus*. Conserved amino acid residues are marked with specific letters.

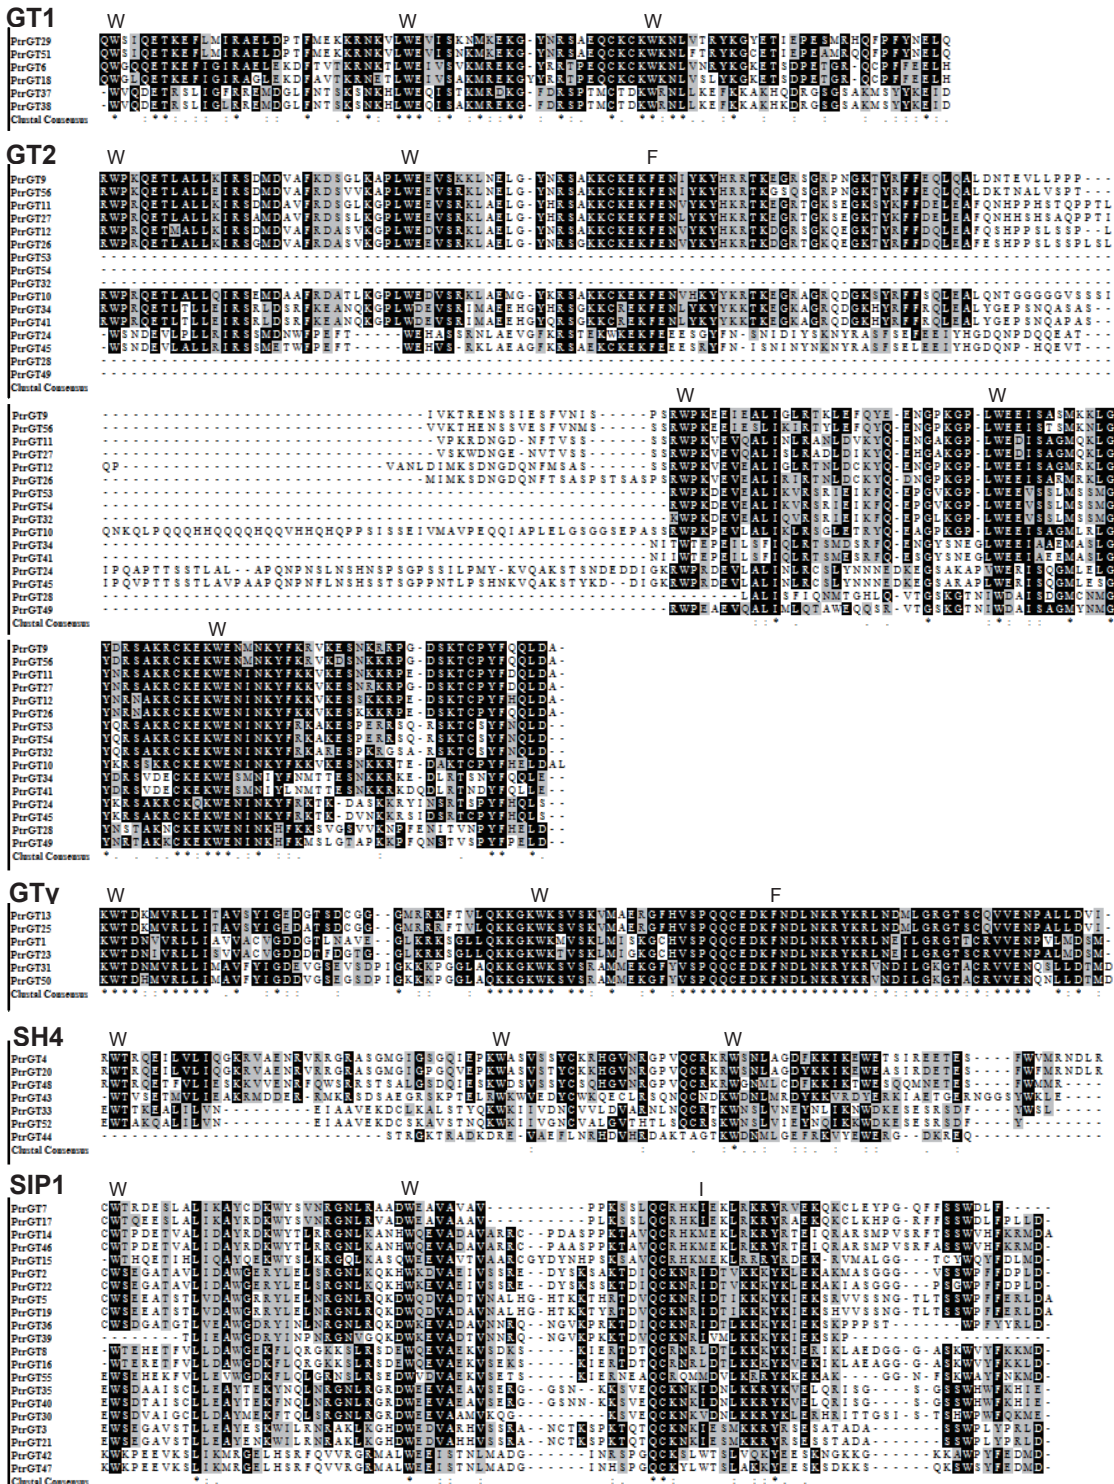

Supplementary Figure S2. Explot analysis of *Populus trihelix* genes in leaves and roots under drought stress. Yellow and black indicate high and low levels of transcript abundances, respectively.

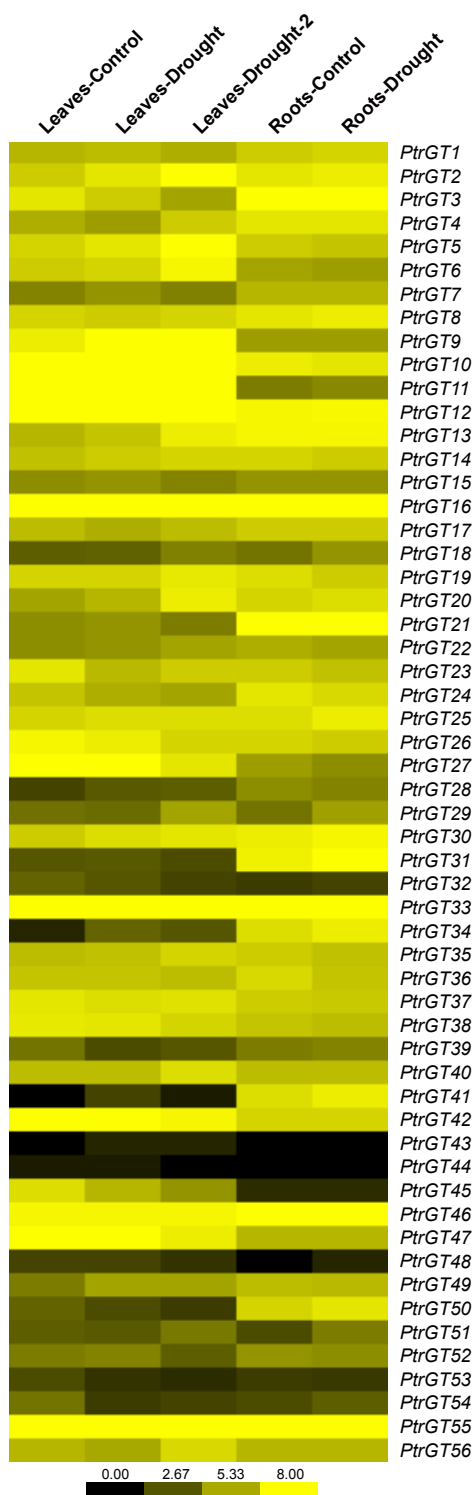

Supplementary Figure S3. The expression levels of marker genes during mannitol, ABA, SA and MeJA treatments.

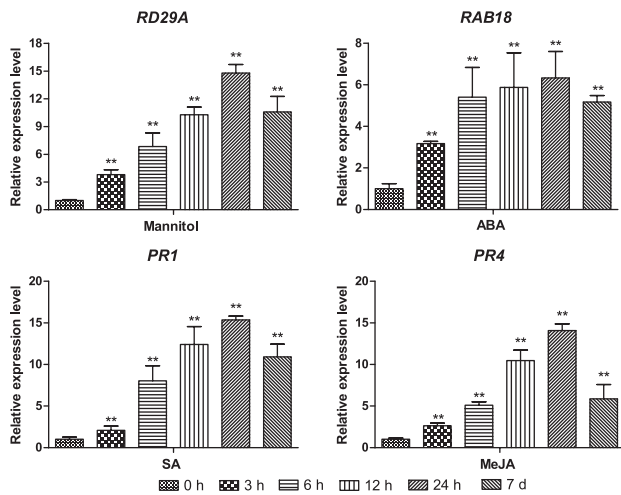

Supplementary Figure S4. The original sequencing peaks of 5' RLM-RACE.

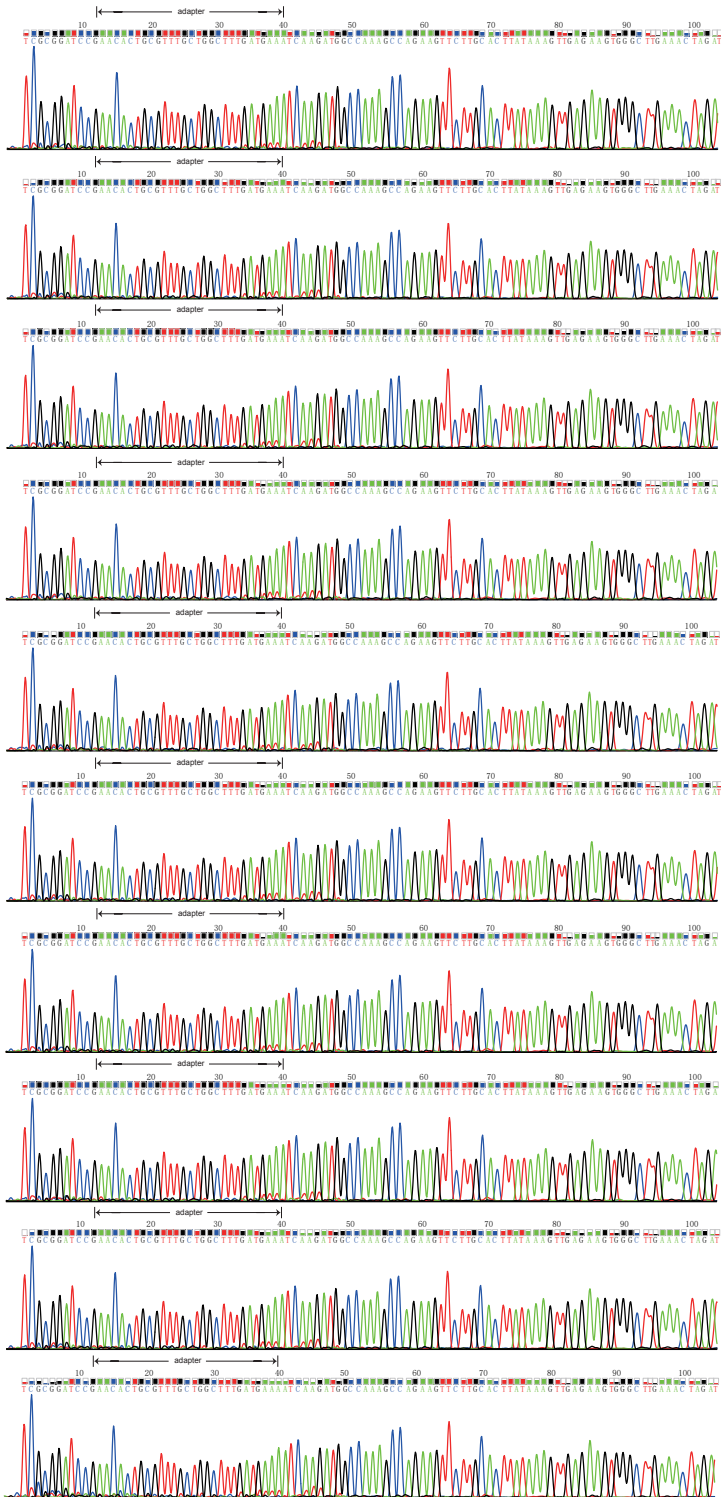

Supplementary Figure S5. The expression levels of *PtrGT10* in control and DR plants under normal and osmotic conditions.

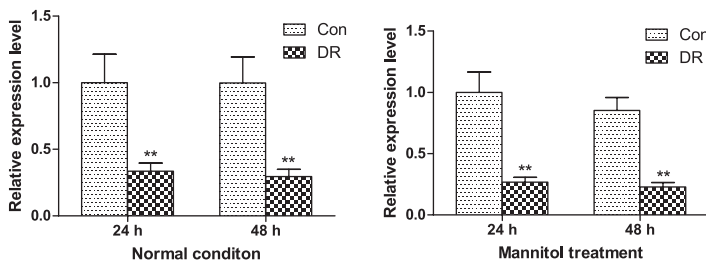

**Supplementary Table S1. Alternative splicing of *Populus trihelix* genes.**

| <b>Gene name</b> | <b>Primary transcript</b> | <b>Other transcripts</b>               |
|------------------|---------------------------|----------------------------------------|
| PtrGT9           | Potri.001G309100.1        | Potri.001G309100.2                     |
| PtrGT10          | Potri.001G454500.1        | Potri.001G454500.2                     |
| PtrGT20          | Potri.003G163000.1        | Potri.003G163000.2                     |
| PtrGT21          | Potri.003G195300.1        | Potri.003G195300.2                     |
| PtrGT24          | Potri.005G051700.1        | Potri.005G051700.2, Potri.005G051700.3 |
| PtrGT25          | Potri.005G191700.1        | Potri.005G191700.2                     |
| PtrGT28          | Potri.006G005300.1        | Potri.006G005300.2                     |
| PtrGT30          | Potri.006G117300.1        | Potri.006G117300.2                     |
| PtrGT32          | Potri.006G221400.1        | Potri.006G221400.2                     |
| PtrGT33          | Potri.006G279100.1        | Potri.006G279100.2                     |
| PtrGT35          | Potri.008G027000.1        | Potri.008G027000.2                     |
| PtrGT36          | Potri.008G071300.1        | Potri.008G071300.2                     |
| PtrGT37          | Potri.008G179700.1        | Potri.008G179700.2, Potri.008G179700.3 |
| PtrGT40          | Potri.010G233500.1        | Potri.010G233500.2                     |
| PtrGT45          | Potri.013G039100.1        | Potri.013G039100.2                     |
| PtrGT47          | Potri.015G093600.1        | Potri.015G093600.2                     |
| PtrGT55          | Potri.018G075500.1        | Potri.018G075500.2                     |

**Supplementary Table S2. List of trihelix genes identified in *Populus* and their sequence characteristics.**

| Gene name | Accession number | TF ID              | NCBI locus ID  | <i>Arabidopsis</i> | Length (a.a.) | M.W. (Da) | pI    | Localization |
|-----------|------------------|--------------------|----------------|--------------------|---------------|-----------|-------|--------------|
|           |                  |                    |                | ortholog locus     |               |           |       |              |
| PtrGT1    | POPTR_0001s05670 | Potri.001G019200.1 | XP_002299233.1 | AT1G21200.1        | 459           | 51475.2   | 5.53  | nucleus      |
| PtrGT2    | POPTR_0001s06330 | Potri.001G026000.1 | XP_002297748.1 | AT3G14180.1        | 325           | 36419.90  | 4.94  | nucleus      |
| PtrGT3    | POPTR_0001s06580 | Potri.001G028400.1 | XP_002299199.1 | AT3G54390.1        | 352           | 38717.00  | 10.36 | nucleus      |
| PtrGT4    | POPTR_0001s13060 | Potri.001G066900.1 | XP_002299351.1 | AT2G33550.1        | 346           | 38046.60  | 6.20  | nucleus      |
| PtrGT5    | POPTR_0001s08350 | Potri.001G113600.1 | XP_002299577.1 | AT3G58630.1        | 302           | 34336.30  | 5.25  | nucleus      |
| PtrGT6    | POPTR_0001s01210 | Potri.001G129900.1 | XP_002326589.1 | AT2G38250.1        | 296           | 35117.60  | 8.47  | nucleus      |
| PtrGT7    | POPTR_0001s15070 | Potri.001G150600.1 | XP_002326679.1 | AT2G44730.1        | 471           | 52310.00  | 8.29  | cytoplasm    |
| PtrGT8    | POPTR_0001s18000 | Potri.001G179800.1 | XP_002298141.1 | AT3G24490.1        | 334           | 38374.20  | 4.70  | nucleus      |
| PtrGT9    | POPTR_0001s31660 | Potri.001G309100.1 | XP_002298711.1 | AT1G76880.1        | 502           | 57379.40  | 5.34  | nucleus      |
| PtrGT10   | POPTR_0001s45870 | Potri.001G454500.1 | XP_002300534.1 | AT1G33240.1        | 794           | 86862.50  | 5.42  | nucleus      |
| PtrGT11   | POPTR_0002s06900 | Potri.002G068400.1 | XP_002300920.1 | AT1G76890.2        | 593           | 66528.00  | 5.39  | nucleus      |
| PtrGT12   | POPTR_0002s06920 | Potri.002G068600.1 | XP_002302180.1 | AT1G76880.1        | 605           | 67207.10  | 7.94  | nucleus      |
| PtrGT13   | POPTR_0002s06930 | Potri.002G068700.1 | XP_002302181.1 | AT1G21200.1        | 420           | 48443.90  | 6.51  | nucleus      |
| PtrGT14   | POPTR_0002s14030 | Potri.002G139500.1 | XP_002301240.1 | AT2G44730.1        | 365           | 40637.90  | 9.96  | nucleus      |
| PtrGT15   | POPTR_0002s24480 | Potri.002G243300.1 | XP_002301790.1 | AT3G24860.1        | 294           | 33991.10  | 5.93  | nucleus      |
| PtrGT16   | POPTR_0003s05470 | Potri.003G056000.1 | XP_002303280.1 | AT3G24490.1        | 413           | 47342.30  | 4.29  | nucleus      |
| PtrGT17   | POPTR_0003s08210 | Potri.003G083800.1 | XP_002329555.1 | AT2G44730.1        | 457           | 50734.40  | 8.30  | nucleus      |
| PtrGT18   | POPTR_0003s10360 | Potri.003G104500.1 | XP_002304391.1 | AT2G38250.1        | 300           | 35284.80  | 8.06  | nucleus      |
| PtrGT19   | POPTR_0003s11850 | Potri.003G118600.1 | XP_002303549.1 | AT3G58630.1        | 290           | 32978.00  | 5.80  | nucleus      |
| PtrGT20   | POPTR_0003s16150 | Potri.003G163000.1 | XP_002299351.1 | AT2G33550.1        | 342           | 37593.10  | 7.15  | nucleus      |
| PtrGT21   | POPTR_0003s19470 | Potri.003G195300.1 | XP_002303935.1 | AT3G54390.1        | 352           | 38706.90  | 10.23 | nucleus      |
| PtrGT22   | POPTR_0003s19840 | Potri.003G198800.1 | XP_002304787.1 | AT3G14180.1        | 365           | 40652.20  | 9.19  | nucleus      |
| PtrGT23   | POPTR_0003s20370 | Potri.003G204700.1 | XP_002303892.1 | AT1G21200.1        | 454           | 51187.00  | 6.56  | nucleus      |
| PtrGT24   | POPTR_0005s05330 | Potri.005G051700.1 | XP_002319635.1 | AT5G28300.1        | 626           | 71086.90  | 6.64  | nucleus      |
| PtrGT25   | POPTR_0005s21390 | Potri.005G191700.1 | XP_002306694.1 | AT1G21200.1        | 438           | 50474.00  | 6.85  | nucleus      |
| PtrGT26   | POPTR_0005s21410 | Potri.005G191900.1 | XP_002306695.1 | AT1G76880.1        | 608           | 67986.00  | 6.54  | nucleus      |
| PtrGT27   | POPTR_0005s21420 | Potri.005G192000.1 | XP_002307497.1 | AT1G76890.2        | 587           | 65833.60  | 6.35  | nucleus      |
| PtrGT28   | POPTR_0006s00710 | Potri.006G005300.1 | XP_002308761.1 | AT1G76890.2        | 295           | 32572.60  | 7.02  | nucleus      |
| PtrGT29   | POPTR_0006s10240 | Potri.006G101400.1 | XP_002308224.1 | AT5G01380.1        | 274           | 32831.00  | 8.12  | nucleus      |
| PtrGT30   | POPTR_0006s11850 | Potri.006G117300.1 | XP_006381330.1 | AT3G10030.1        | 492           | 53875.50  | 6.63  | cytoplasm    |
| PtrGT31   | POPTR_0006s11870 | Potri.006G117500.1 | XP_002326236.1 | AT3G10040.1        | 483           | 55719.30  | 5.40  | nucleus      |
| PtrGT32   | POPTR_0006s23800 | Potri.006G221400.1 | XP_002308526.1 | AT1G76890.2        | 618           | 70311.00  | 6.31  | nucleus      |
| PtrGT33   | POPTR_0006s29340 | Potri.006G279100.1 | XP_002330777.1 | AT4G31270.1        | 459           | 53622.60  | 4.99  | nucleus      |
| PtrGT34   | POPTR_0008s02580 | Potri.008G025600.1 | XP_002311966.1 | AT5G03680.1        | 571           | 66028.00  | 6.60  | nucleus      |
| PtrGT35   | POPTR_0008s02730 | Potri.008G027000.1 | XP_002311975.1 | AT3G10030.1        | 499           | 54134.90  | 8.09  | nucleus      |
| PtrGT36   | POPTR_0008s07140 | Potri.008G071300.1 | XP_002311242.1 | AT5G05550.2        | 251           | 28839.60  | 9.49  | nucleus      |
| PtrGT37   | POPTR_0008s17980 | Potri.008G179700.1 | XP_002312646.1 | AT1G13450.1        | 385           | 44093.40  | 6.66  | nucleus      |
| PtrGT38   | POPTR_0010s06510 | Potri.010G055000.1 | XP_002315635.1 | AT1G13450.1        | 384           | 44078.20  | 6.52  | nucleus      |
| PtrGT39   | POPTR_0010s19350 | Potri.010G186200.1 | XP_002316198.1 | AT5G05550.2        | 279           | 33004.80  | 10.19 | nucleus      |



---

|         |                  |                    |                |             |     |           |       |             |
|---------|------------------|--------------------|----------------|-------------|-----|-----------|-------|-------------|
| PtrGT40 | POPTR_0010s23970 | Potri.010G233500.1 | XP_002315355.1 | AT3G10030.1 | 472 | 50892.90  | 8.31  | nucleus     |
| PtrGT41 | POPTR_0010s24140 | Potri.010G235000.1 | XP_002316512.1 | AT5G03680.1 | 575 | 66590.50  | 6.19  | nucleus     |
| PtrGT42 | POPTR_0012s09780 | Potri.012G095800.1 | XP_002318122.1 | AT5G63420.1 | 916 | 101174.00 | 8.59  | chloroplast |
| PtrGT43 | POPTR_0012s11820 | Potri.012G117500.1 | XP_002332145.1 | AT2G35640.1 | 355 | 39719.70  | 8.36  | nucleus     |
| PtrGT44 | POPTR_0012s14050 | Potri.012G132300.1 | XP_002318853.1 | AT2G33550.1 | 994 | 111294.00 | 7.17  | nucleus     |
| PtrGT45 | POPTR_0013s03670 | Potri.013G039100.1 | XP_002319635.1 | AT5G28300.1 | 647 | 73253.40  | 6.69  | nucleus     |
| PtrGT46 | POPTR_0014s05010 | Potri.014G051200.1 | XP_002327024.1 | AT2G44730.1 | 343 | 38131.60  | 10.63 | chloroplast |
| PtrGT47 | POPTR_0015s10570 | Potri.015G093600.1 | XP_002318122.1 | AT5G63420.1 | 890 | 98789.00  | 8.34  | chloroplast |
| PtrGT48 | POPTR_0015s11710 | Potri.015G105800.1 | XP_002322303.1 | AT2G33550.1 | 299 | 34823.90  | 7.38  | nucleus     |
| PtrGT49 | POPTR_0016s00760 | Potri.016G005900.1 | XP_002323120.1 | AT5G47660.1 | 363 | 39937.60  | 5.07  | nucleus     |
| PtrGT50 | POPTR_0016s11010 | Potri.016G096300.1 | XP_002326236.1 | AT3G10040.1 | 470 | 53990.00  | 6.39  | nucleus     |
| PtrGT51 | POPTR_0016s12470 | Potri.016G117300.1 | XP_002322985.1 | AT5G01380.1 | 279 | 33431.10  | 9.69  | nucleus     |
| PtrGT52 | POPTR_0018s04010 | Potri.018G002800.1 | XP_002332103.1 | AT4G31270.1 | 319 | 36550.30  | 5.11  | nucleus     |
| PtrGT53 | POPTR_0310s00200 | Potri.018G049500.1 | XP_002324192.1 | AT1G76890.2 | 316 | 36739.80  | 9.89  | peroxisomal |
| PtrGT54 | POPTR_0018s05520 | Potri.018G049700.1 | XP_002324190.1 | AT1G76890.2 | 610 | 70003.40  | 6.45  | nucleus     |
| PtrGT55 | POPTR_0018s06120 | Potri.018G075500.1 | XP_002324407.1 | AT3G24490.1 | 354 | 41349.40  | 4.32  | nucleus     |
| PtrGT56 | POPTR_0019s02650 | Potri.019G010200.1 | XP_002331882.1 | AT1G76890.2 | 496 | 56887.80  | 5.02  | nucleus     |

---

**Supplementary Table S3. Motif sequences of trihelix genes.**

| <b>Motif</b> | <b>Width<br/>(a.a.)</b> | <b>Best possible match</b>                          | <b>Domain</b>                            |
|--------------|-------------------------|-----------------------------------------------------|------------------------------------------|
| 1            | 21                      | GYHRS AKQCKCKWENLNKYYK                              | the third $\alpha$ -helix                |
| 2            | 26                      | NCWPEQETLALIDIWSEMWIWFNRGN                          | the first $\alpha$ -helix                |
| 3            | 50                      | WKDFFERLMKKVMEKQEMMHNKFLETIEKCEHERMCREEAWRMQEMARIN  | NA                                       |
| 4            | 41                      | KGPLWEEVSRKLAELGYNRS AKKCKEFENVYKYHKRTKEG           | the second $\alpha$ -helix in GT2        |
| 5            | 15                      | STWPFYFHQLDALYNG                                    | the fourth amphipathic $\alpha$ -helix   |
| 6            | 35                      | MLADA IKWFG EIVRIESMKMQMVELEKMRMEFQ                 | NA                                       |
| 7            | 15                      | KGPLWEEVSAAMSEK                                     | NA                                       |
| 8            | 29                      | REHEIWAHERAWAAARDAAIMAF LQKITG                      | NA                                       |
| 9            | 29                      | SSSRWPKVEILALIQLRTNLECRYQENGP                       | NA                                       |
| 10           | 50                      | HSTTDKGGKKGSPWQRMKWTDNMVRLLITAVFYIGDDGTSDCGGGMRRKFP | the first $\alpha$ -helix in GT $\gamma$ |
| 11           | 41                      | WEQKQWMKKRTLQLEEQQVNIQCQAFELEKQRFKWRFC SK           | NA                                       |
| 12           | 28                      | RLNDILGRGTSCRVENPALLDTMDYLT                         | NA                                       |
| 13           | 50                      | FFQQQQMEMQWREVF EAREHERQMFEQEWRSMEKLENERLMMEQRWRE   | coiled coil                              |
| 14           | 29                      | RTGKQEGKTYRFFDQLEAFQNHPHLSPP                        | the third $\alpha$ -helix in GT2         |
| 15           | 46                      | KEWEKEIRNETEFFWFMRELRRFKLPGFFDREVYYILDGYMWTV        | the extended third trihelix              |

**Supplementary Table S4. Phytohormone- and abiotic stress-related *cis*-elements.**

| <b>Element</b>  | <b>Core sequence</b> | <b>Function annotation</b>                                  |
|-----------------|----------------------|-------------------------------------------------------------|
| ABRE            | TACGGTC              | Response to abscisic acid                                   |
| CGTCA-motif     | CGTCA                | Response to MeJA                                            |
| ERE             | ATTTCAAA             | Response to ethylene                                        |
| G-Box           | CACGTT               | Response to MeJA                                            |
| TCA-element     | GAGAAGAATA           | Response to salicylic acid                                  |
| TGACG-motif     | TGACG                | Response to MeJA                                            |
| W-Box           | TTGACC               | WRKY binding site involved in abiotic stress responsiveness |
| HSE             | AAAAAATTTC           | Response to heat stress                                     |
| MBS             | TAACTG               | MYB binding site involved in drought-inducibility           |
| LTR             | CCGAAA               | Response to low-temperature stress                          |
| DRE             | TACCGACAT            | Response to dehydration, low-temp, salt stresses            |
| TC-rich repeats | ATTCTCTAAC           | Involve in defense and stress responsiveness                |
| EIRE            | TTCGACC              | Response to fungus                                          |
| ELI-box3        | AAACCAATT            | Response to fungus                                          |

Supplementary Table S5. Numbers of *cis*-elements in trihelix genes.

| Gene name      | <i>Cis</i> -elements related to phytohormone |        |     |      |         |        | <i>Cis</i> -elements related to abiotic stress responsiveness |     |     |     |         |     | <i>Cis</i> -elements related to Fungi |          |
|----------------|----------------------------------------------|--------|-----|------|---------|--------|---------------------------------------------------------------|-----|-----|-----|---------|-----|---------------------------------------|----------|
|                | AB                                           | CGTCA  | ERE | G-Bo | TCA-ele | TGACG  | DRE                                                           | HSE | LTR | MBS | TC-rich | W   | EIRE                                  | ELI-box3 |
|                | RE                                           | -motif |     | x    | ment    | -motif |                                                               |     |     |     | repeats | box |                                       |          |
| <i>PtrGT1</i>  | ●                                            | ●      |     | ●    | ●       | ●      |                                                               | ●   | ●   | ●   | ●       |     |                                       |          |
| <i>PtrGT2</i>  | ●                                            | ●      |     |      | ●       | ●      |                                                               | ●   | ●   |     | ●       |     |                                       |          |
| <i>PtrGT3</i>  | ●                                            |        | ●   | ●    | ●       | ●      |                                                               | ●   |     | ●   | ●       |     |                                       |          |
| <i>PtrGT4</i>  |                                              |        |     |      | ●       |        |                                                               |     |     |     | ●       |     |                                       |          |
| <i>PtrGT5</i>  |                                              | ●      | ●   | ●    |         | ●      |                                                               |     |     | ●   |         | ●   |                                       |          |
| <i>PtrGT6</i>  |                                              | ●      | ●   |      |         | ●      |                                                               | ●   |     | ●   | ●       |     |                                       |          |
| <i>PtrGT7</i>  |                                              | ●      |     | ●    | ●       | ●      |                                                               |     |     | ●   | ●       | ●   |                                       |          |
| <i>PtrGT8</i>  |                                              |        |     |      | ●       |        |                                                               | ●   |     | ●   | ●       | ●   |                                       |          |
| <i>PtrGT9</i>  |                                              | ●      |     | ●    |         | ●      |                                                               | ●   |     |     |         | ●   |                                       |          |
| <i>PtrGT10</i> | ●                                            |        | ●   | ●    |         |        |                                                               | ●   |     |     | ●       |     |                                       |          |
| <i>PtrGT11</i> | ●                                            |        |     | ●    |         |        |                                                               | ●   |     | ●   | ●       | ●   |                                       |          |
| <i>PtrGT12</i> | ●                                            | ●      |     | ●    | ●       | ●      |                                                               | ●   | ●   | ●   |         | ●   |                                       |          |
| <i>PtrGT13</i> | ●                                            |        | ●   | ●    | ●       |        |                                                               | ●   |     |     | ●       | ●   | ●                                     |          |
| <i>PtrGT14</i> |                                              | ●      | ●   |      | ●       | ●      | ●                                                             | ●   | ●   | ●   | ●       | ●   |                                       | ●        |
| <i>PtrGT15</i> |                                              | ●      |     |      |         | ●      |                                                               | ●   | ●   |     | ●       | ●   | ●                                     |          |
| <i>PtrGT16</i> |                                              | ●      |     | ●    |         | ●      |                                                               | ●   |     |     | ●       |     |                                       |          |
| <i>PtrGT17</i> |                                              | ●      | ●   | ●    | ●       | ●      |                                                               | ●   | ●   | ●   | ●       | ●   |                                       |          |
| <i>PtrGT18</i> | ●                                            |        |     | ●    | ●       | ●      |                                                               | ●   | ●   |     | ●       |     |                                       |          |
| <i>PtrGT19</i> | ●                                            | ●      |     | ●    | ●       | ●      |                                                               |     |     | ●   | ●       |     |                                       |          |
| <i>PtrGT20</i> |                                              |        |     | ●    |         |        |                                                               | ●   |     | ●   | ●       | ●   |                                       |          |
| <i>PtrGT21</i> | ●                                            | ●      |     | ●    |         | ●      |                                                               | ●   |     | ●   | ●       | ●   |                                       |          |
| <i>PtrGT22</i> | ●                                            |        |     | ●    | ●       |        |                                                               | ●   | ●   | ●   | ●       |     |                                       |          |
| <i>PtrGT23</i> | ●                                            | ●      |     | ●    | ●       | ●      |                                                               | ●   | ●   | ●   | ●       |     |                                       |          |
| <i>PtrGT24</i> | ●                                            | ●      | ●   | ●    | ●       | ●      |                                                               | ●   | ●   | ●   |         |     |                                       |          |
| <i>PtrGT25</i> | ●                                            | ●      | ●   | ●    | ●       | ●      |                                                               | ●   | ●   |     | ●       |     |                                       |          |
| <i>PtrGT26</i> | ●                                            | ●      | ●   | ●    | ●       | ●      |                                                               | ●   | ●   | ●   | ●       | ●   |                                       |          |
| <i>PtrGT27</i> | ●                                            | ●      | ●   | ●    | ●       | ●      |                                                               |     |     |     | ●       |     | ●                                     |          |
| <i>PtrGT28</i> |                                              |        | ●   | ●    | ●       |        |                                                               | ●   | ●   |     | ●       |     |                                       |          |
| <i>PtrGT29</i> | ●                                            |        | ●   | ●    | ●       | ●      |                                                               | ●   | ●   | ●   | ●       | ●   |                                       |          |
| <i>PtrGT30</i> | ●                                            |        |     | ●    |         |        |                                                               | ●   | ●   |     |         | ●   |                                       |          |
| <i>PtrGT31</i> | ●                                            |        | ●   | ●    | ●       |        |                                                               | ●   |     | ●   | ●       |     |                                       |          |
| <i>PtrGT32</i> |                                              | ●      | ●   | ●    |         | ●      |                                                               | ●   | ●   | ●   | ●       | ●   |                                       | ●        |
| <i>PtrGT33</i> | ●                                            | ●      |     |      |         | ●      |                                                               | ●   | ●   | ●   | ●       |     |                                       |          |
| <i>PtrGT34</i> | ●                                            |        |     | ●    |         |        |                                                               |     | ●   | ●   | ●       | ●   |                                       |          |
| <i>PtrGT35</i> |                                              | ●      | ●   |      | ●       | ●      |                                                               | ●   | ●   | ●   |         | ●   |                                       | ●        |
| <i>PtrGT36</i> | ●                                            | ●      |     | ●    | ●       | ●      |                                                               | ●   | ●   | ●   | ●       | ●   |                                       |          |
| <i>PtrGT37</i> | ●                                            |        |     | ●    |         | ●      |                                                               | ●   |     | ●   | ●       | ●   |                                       |          |
| <i>PtrGT38</i> |                                              | ●      | ●   | ●    | ●       | ●      |                                                               | ●   |     | ●   | ●       | ●   |                                       |          |
| <i>PtrGT39</i> |                                              | ●      |     |      |         | ●      |                                                               | ●   | ●   | ●   |         | ●   |                                       |          |

---

|                |   |   |   |   |   |   |   |   |   |   |   |
|----------------|---|---|---|---|---|---|---|---|---|---|---|
| <i>PtrGT40</i> | ● | ● | ● | ● |   | ● |   |   | ● | ● | ● |
| <i>PtrGT41</i> |   | ● | ● | ● |   | ● | ● |   | ● |   | ● |
| <i>PtrGT42</i> | ● | ● | ● | ● | ● | ● | ● |   | ● | ● | ● |
| <i>PtrGT43</i> |   | ● |   | ● | ● | ● | ● | ● | ● | ● | ● |
| <i>PtrGT44</i> |   | ● | ● |   | ● | ● | ● |   |   | ● | ● |
| <i>PtrGT45</i> | ● |   |   |   |   |   | ● | ● | ● | ● | ● |
| <i>PtrGT46</i> | ● |   | ● | ● |   |   | ● | ● |   | ● |   |
| <i>PtrGT47</i> | ● | ● | ● | ● | ● | ● | ● |   | ● |   | ● |
| <i>PtrGT48</i> | ● | ● | ● | ● | ● | ● |   | ● | ● | ● | ● |
| <i>PtrGT49</i> |   | ● |   |   | ● | ● |   | ● | ● | ● | ● |
| <i>PtrGT50</i> |   |   | ● | ● | ● |   | ● |   | ● | ● | ● |
| <i>PtrGT51</i> | ● |   |   | ● | ● | ● |   |   | ● |   |   |
| <i>PtrGT52</i> | ● | ● |   | ● |   | ● | ● |   | ● | ● | ● |
| <i>PtrGT53</i> |   | ● | ● |   | ● | ● | ● | ● |   |   |   |
| <i>PtrGT54</i> |   | ● |   | ● | ● | ● | ● |   | ● | ● |   |
| <i>PtrGT55</i> |   |   |   | ● | ● |   | ● |   | ● |   | ● |
| <i>PtrGT56</i> |   | ● |   | ● | ● | ● | ● |   | ● |   |   |

---

**Supplementary Table S6. Details of the Gene Ontology annotation.**

| Seq.<br>Name | Annotation number | GOs                                                                                                                                                                                                                                                                                                              |
|--------------|-------------------|------------------------------------------------------------------------------------------------------------------------------------------------------------------------------------------------------------------------------------------------------------------------------------------------------------------|
| PtrGT1       | 1                 | F:chromatin binding                                                                                                                                                                                                                                                                                              |
| PtrGT2       | 8                 | C:nucleus; F:DNA binding; F:sequence-specific DNA binding transcription factor activity; P:transcription, DNA-templated; P:embryo development ending in seed dormancy; P:seed maturation; P:post-translational protein modification; P:positive regulation of transcription, DNA-templated                       |
| PtrGT3       | 3                 | P:regulation of transcription, DNA-templated; F:sequence-specific DNA binding transcription factor activity; F:chromatin binding                                                                                                                                                                                 |
| PtrGT4       | 1                 | F:DNA binding                                                                                                                                                                                                                                                                                                    |
| PtrGT5       | 2                 | P:regulation of transcription, DNA-templated; F:sequence-specific DNA binding transcription factor activity                                                                                                                                                                                                      |
| PtrGT6       | 6                 | C:nucleus; F:chromatin binding; F:sequence-specific DNA binding transcription factor activity; F:sequence-specific DNA binding; P:transcription, DNA-templated; P:regulation of transcription, DNA-templated                                                                                                     |
| PtrGT7       | 3                 | F:chromatin binding; C:vacuole; C:nucleus                                                                                                                                                                                                                                                                        |
| PtrGT8       | 2                 | F:DNA binding; F:chromatin binding                                                                                                                                                                                                                                                                               |
| PtrGT9       | 2                 | F:DNA binding; F:chromatin binding                                                                                                                                                                                                                                                                               |
| PtrGT10      | 7                 | F:DNA binding; F:chromatin binding; P:cellular component organization; P:single-organism cellular process; P:negative regulation of nucleobase-containing compound metabolic process; P:regulation of multicellular organismal development; P:negative regulation of cellular macromolecule biosynthetic process |
| PtrGT11      | 2                 | F:DNA binding; F:chromatin binding                                                                                                                                                                                                                                                                               |
| PtrGT12      | 2                 | F:DNA binding; F:chromatin binding                                                                                                                                                                                                                                                                               |
| PtrGT13      | 1                 | F:chromatin binding                                                                                                                                                                                                                                                                                              |
| PtrGT14      | 3                 | F:chromatin binding; F:sequence-specific DNA binding transcription factor activity; P:regulation of transcription, DNA-templated                                                                                                                                                                                 |
| PtrGT15      | 2                 | F:sequence-specific DNA binding transcription factor activity; P:regulation of transcription, DNA-templated                                                                                                                                                                                                      |
| PtrGT16      | 2                 | F:DNA binding; F:chromatin binding                                                                                                                                                                                                                                                                               |
| PtrGT17      | 1                 | F:chromatin binding                                                                                                                                                                                                                                                                                              |
| PtrGT18      | 6                 | C:nucleus; F:chromatin binding; F:sequence-specific DNA binding transcription factor activity; F:sequence-specific DNA binding; P:transcription, DNA-templated; P:regulation of transcription, DNA-templated                                                                                                     |
| PtrGT19      | 2                 | P:regulation of transcription, DNA-templated; F:sequence-specific DNA binding transcription factor activity                                                                                                                                                                                                      |
| PtrGT20      | 1                 | F:DNA binding                                                                                                                                                                                                                                                                                                    |
| PtrGT21      | 2                 | F:sequence-specific DNA binding transcription factor activity; P:regulation of transcription, DNA-templated                                                                                                                                                                                                      |
| PtrGT22      | 0                 | -                                                                                                                                                                                                                                                                                                                |
| PtrGT23      | 1                 | F:chromatin binding                                                                                                                                                                                                                                                                                              |
| PtrGT24      | 1                 | F:chromatin binding                                                                                                                                                                                                                                                                                              |

---

|         |   |                                                                                                                                                                                                                                                         |
|---------|---|---------------------------------------------------------------------------------------------------------------------------------------------------------------------------------------------------------------------------------------------------------|
| PtrGT25 | 1 | F:chromatin binding                                                                                                                                                                                                                                     |
| PtrGT26 | 2 | F:DNA binding; F:chromatin binding                                                                                                                                                                                                                      |
| PtrGT27 | 2 | F:DNA binding; F:chromatin binding                                                                                                                                                                                                                      |
| PtrGT28 | 4 | F:chromatin binding; F:DNA binding; P:regulation of transcription, DNA-templated;<br>F:sequence-specific DNA binding transcription factor activity                                                                                                      |
| PtrGT29 | 6 | C:nucleus; F:chromatin binding; F:sequence-specific DNA binding transcription factor activity;<br>F:sequence-specific DNA binding; P:transcription, DNA-templated; P:regulation of transcription,<br>DNA-templated                                      |
| PtrGT30 | 7 | C:cytoplasm; F:chromatin binding; F:UMP kinase activity; P:nuclear-transcribed mRNA catabolic<br>process; P:pyrimidine nucleotide biosynthetic process; P:nucleotide phosphorylation;<br>P:photoperiodism, flowering                                    |
| PtrGT31 | 4 | P:response to stress; P:pattern specification process; P:regulation of cellular metabolic process;<br>P:meristem development                                                                                                                            |
| PtrGT32 | 1 | F:chromatin binding                                                                                                                                                                                                                                     |
| PtrGT33 | 6 | F:chromatin binding; P:regulation of transcription, DNA-templated; P:post-translational protein<br>modification; C:plasmodesma; P:positive regulation of transcription, DNA-templated;<br>F:sequence-specific DNA binding transcription factor activity |
| PtrGT34 | 1 | F:chromatin binding                                                                                                                                                                                                                                     |
| PtrGT35 | 5 | C:cytoplasm; F:chromatin binding; F:UMP kinase activity; P:pyrimidine nucleotide biosynthetic<br>process; P:nucleotide phosphorylation                                                                                                                  |
| PtrGT36 | 0 | -                                                                                                                                                                                                                                                       |
| PtrGT37 | 6 | C:nucleus; F:DNA binding; F:chromatin binding; F:sequence-specific DNA binding transcription<br>factor activity; P:transcription, DNA-templated; P:regulation of transcription, DNA-templated                                                           |
| PtrGT38 | 6 | C:nucleus; F:DNA binding; F:chromatin binding; F:sequence-specific DNA binding transcription<br>factor activity; P:transcription, DNA-templated; P:regulation of transcription, DNA-templated                                                           |
| PtrGT39 | 0 | -                                                                                                                                                                                                                                                       |
| PtrGT40 | 7 | C:cytoplasm; F:chromatin binding; F:UMP kinase activity; P:nuclear-transcribed mRNA catabolic<br>process; P:pyrimidine nucleotide biosynthetic process; P:nucleotide phosphorylation;<br>P:photoperiodism, flowering                                    |
| PtrGT41 | 1 | F:chromatin binding                                                                                                                                                                                                                                     |
| PtrGT42 | 7 | C:chloroplast; F:DNA binding; F:chromatin binding; F:RNA binding; F:metal ion binding;<br>P:photosynthesis; P:cellular respiration                                                                                                                      |
| PtrGT43 | 1 | F:DNA binding                                                                                                                                                                                                                                           |
| PtrGT44 | 3 | F:kinase activity; P:phosphorylation; P:carpel morphogenesis                                                                                                                                                                                            |
| PtrGT45 | 1 | F:chromatin binding                                                                                                                                                                                                                                     |
| PtrGT46 | 1 | F:chromatin binding                                                                                                                                                                                                                                     |
| PtrGT47 | 7 | C:chloroplast; F:DNA binding; F:chromatin binding; F:RNA binding; F:metal ion binding;<br>P:photosynthesis; P:cellular respiration                                                                                                                      |
| PtrGT48 | 1 | P:regulation of transcription, DNA-templated                                                                                                                                                                                                            |
| PtrGT49 | 2 | F:DNA binding; F:chromatin binding                                                                                                                                                                                                                      |
| PtrGT50 | 4 | P:response to stress; P:pattern specification process; P:regulation of cellular metabolic process;<br>P:meristem development                                                                                                                            |
| PtrGT51 | 6 | C:nucleus; F:chromatin binding; F:sequence-specific DNA binding transcription factor activity; F:sequence-specific<br>DNA binding; P:transcription, DNA-templated; P:regulation of transcription, DNA-templated                                         |

---

---

|         |   |                                                                                                                                                                                                                                                   |
|---------|---|---------------------------------------------------------------------------------------------------------------------------------------------------------------------------------------------------------------------------------------------------|
| PtrGT52 | 6 | F:chromatin binding; P:regulation of transcription, DNA-templated; P:post-translational protein modification; C:plasmodesma; P:positive regulation of transcription, DNA-templated; F:sequence-specific DNA binding transcription factor activity |
| PtrGT53 | 1 | F:chromatin binding                                                                                                                                                                                                                               |
| PtrGT54 | 1 | F:chromatin binding                                                                                                                                                                                                                               |
| PtrGT55 | 3 | F:sequence-specific DNA binding transcription factor activity; P:post-translational protein modification; P:positive regulation of transcription, DNA-templated                                                                                   |
| PtrGT56 | 2 | F:DNA binding; F:chromatin binding                                                                                                                                                                                                                |

---

P, F and C represent biosynthetic process, molecular function and cellular component, respectively.



**Supplementary Table S7. Primers designed using Primer Premier 5.**

| <b>Gene name</b> | <b>Sequences (5'-3')</b>                           |
|------------------|----------------------------------------------------|
| <i>PtrGT1</i>    | AATGCTGATGAGGACGGGA<br>CAGGGTCTTGAAAAATCGCTG       |
| <i>PtrGT2</i>    | AGTCACACTCAAACACCAC<br>ACTTCATCGGCAAAACAAG         |
| <i>PtrGT3</i>    | CACCACAACATCAACAAC<br>TGAGCAATCACAATAACT           |
| <i>PtrGT4</i>    | GGAGGATGGGTTGTTTTCGGA<br>GCGGGCCTTTTATCATTGGT      |
| <i>PtrGT5</i>    | TGGCTCTCCCCTGCATCCTTC<br>CCTCCTCGCTATCTGACTCTTG    |
| <i>PtrGT6</i>    | GGAAGAGGAAGGTTGAAAAA<br>CTCCATTGACTGTCGCCATT       |
| <i>PtrGT7</i>    | TCGCGTGAAAACGTTAGGAG<br>ACCATGAACATTAAGCCCC        |
| <i>PtrGT8</i>    | CGGATTGCTTGCAGATTCT<br>TCTCCTCTTCACCGACTT          |
| <i>PtrGT9</i>    | GGTATTACTGCCACCTCC<br>TCTCGTTCCTTCCTCTTC           |
| <i>PtrGT10</i>   | CATGTTTCCTCTGATTT<br>CTGATGTTTGTCTCCTA             |
| <i>PtrGT11</i>   | TTTTCAACAAGCAACCCA<br>AAGCCACCTCCCTCATCC           |
| <i>PtrGT12</i>   | ATCCATCTTCTTTTCCA<br>AACTTATTCTGCGTCTCC            |
| <i>PtrGT13</i>   | CCCTTCAGTTAGAAGAACGGAA<br>GCCATCTGCTCATTCTCAAGT    |
| <i>PtrGT14</i>   | ATGCGAGCCCAGACCCCTACC<br>CCATCTCCAATACCTTACC       |
| <i>PtrGT15</i>   | CAGAAGCATTAACTATATACTCC<br>AAACGCCTTTATTTGCCCGCCA  |
| <i>PtrGT16</i>   | CTCTTTTGGTTTGCTTGC<br>TCTTGATGAATTTTGGCT           |
| <i>PtrGT17</i>   | TGCTCTTCGGGCTAGGAAATATA<br>TCCGTGATCCGGTAATCTAACAA |
| <i>PtrGT18</i>   | AGATGTTTGAGCAGGAATG<br>TTTCACTGATGAGTTTGT          |
| <i>PtrGT19</i>   | TAAGAAACATCTCTCACC<br>TAAAATAATCATCGTCCA           |
| <i>PtrGT20</i>   | ATGGGTTGTTTTCGGATTTT<br>CCTTGAGCTTGACTTGCTTG       |
| <i>PtrGT21</i>   | CTTCTGCCAATCCTCCTTT<br>TCTCCCTTTGCCCCCTAT          |

---

|                |                                                        |
|----------------|--------------------------------------------------------|
| <i>PtrGT22</i> | GAGATGGAGAAGACGAGGA<br>ACGATGGTATTGATGATGG             |
| <i>PtrGT23</i> | AGATATGAATGGGTCAGGG<br>GAGAACAAAGGTGGGAATG             |
| <i>PtrGT24</i> | GAGTTGGGTTACAAGAGGAGTGC<br>GTTTTTCGGTGCTACAAGCGTTC     |
| <i>PtrGT25</i> | ATAGTAGGGGCATACATGGGGTA<br>TTCATATCAACTTGGGCAATCTG     |
| <i>PtrGT26</i> | TCTTTTCCAACTTCTCCCC<br>CTTTCATGTTTCGCGTCTCTC           |
| <i>PtrGT27</i> | TTCCACAACCCAACTAACGCCAC<br>CTAATAAGAGCTTGAACCTCCACT    |
| <i>PtrGT28</i> | CCCTAACGACTTCCCTCT<br>CTAACAAAACCCACAGC                |
| <i>PtrGT29</i> | AGAGAAGGATGAAGGAGATG<br>TAGAAGTGCTGTGATAAGGG           |
| <i>PtrGT30</i> | GCGCTTCTTCTGCTAGCGTATCT<br>AACGTCATCACCTTGGGTCAAT      |
| <i>PtrGT31</i> | GGTTGAAGTGGGTGAGATT<br>TTGTTTGAAGGCAGTTGTT             |
| <i>PtrGT32</i> | GCTCTGGTTCTGTTCTCAC<br>CTTCTCTTCCCTCCTTCGG             |
| <i>PtrGT33</i> | AGCCTAAAATCCATCGTG<br>TGTTCTTTGAATCAGCAG               |
| <i>PtrGT34</i> | GCCACTCAAAGGCACAACAAAAACC<br>AGCCATCTCTGCTGCTATCTCCTCC |
| <i>PtrGT35</i> | CTCTCAAACTAAACCAG<br>CGACCTCCAAGAACAATA                |
| <i>PtrGT36</i> | CGAAACAGCAGCAAATGATA<br>CACAACCTGAACTGGAAGCAA          |
| <i>PtrGT37</i> | GTGCCAGGCCAACACTCA<br>TATCACCTCCCACCAA                 |
| <i>PtrGT38</i> | GAGACCCCTGGGAATGGTGCTGAG<br>CATCCTCCAACCAGAATGCTCGCT   |
| <i>PtrGT39</i> | TAACACAGACAAGAAACCCACC<br>GCAGCCCCATCAGATAAACCTA       |
| <i>PtrGT40</i> | GTCTCAAACTAAACCGG<br>TACGACCTCCAAGAACAA                |
| <i>PtrGT41</i> | TATGATAGGAGTGTGGACGA<br>CAAATAAGAATTAGAAGCG            |
| <i>PtrGT42</i> | TATTGATTCTTATGCCCC<br>TACCCTAGATTCGTTACC               |
| <i>PtrGT43</i> | CAAGCTATGTGGTAGAGAGACC<br>CAATCAATACTAATGTGGGAAA       |

---

---

|                 |                                                        |
|-----------------|--------------------------------------------------------|
| <i>PtrGT44</i>  | ATGGTGTGAAAGTGGATGTGTGGGG<br>GCAAGTGGTGATAACAATCGGCGGC |
| <i>PtrGT45</i>  | AGGGATGTTGGAATCGGGT<br>AAGGTGCTTAATTGGTGAA             |
| <i>PtrGT46</i>  | TTCGGGTAATGCTGGTGGGTTTCG<br>GGCTTCAGGTTCGGGTTTGGGCTC   |
| <i>PtrGT47</i>  | CGGGTGGACAGGAAGCAA<br>TCTCAGAGTCGGAGGAAT               |
| <i>PtrGT48</i>  | CTATGTCTTGATGGGAG<br>GATTTTGTTTTTTGGTTG                |
| <i>PtrGT49</i>  | TCAGATAACTCCATTCCCGC<br>TGTCCTAACCACCCCT               |
| <i>PtrGT50</i>  | AAGTTGGGTTGCCTTGG<br>TTTATTGCCCTTTTTGCC                |
| <i>PtrGT51</i>  | ATCTTCTGACGATGAGGA<br>CATTTGAATCTGTTGCTT               |
| <i>PtrGT52</i>  | GGCTGACTTGCTTGATGTA<br>GTTGCCAATTTGAGGTTTC             |
| <i>PtrGT53</i>  | TTCATTA ACTATCCTTCG<br>GCACCTTTATGTTCTCAC              |
| <i>PtrGT54</i>  | CACGGTGAAGAAAGTGATG<br>CTATTTGAAGTTGAAGCCC             |
| <i>PtrGT55</i>  | TATTTGGATCGTGCCAATATGAAT<br>CATCTGCTCCCTCTTACTGCTCTC   |
| <i>PtrGT56</i>  | AAGAAAATGGACCAAAGGG<br>AGAGCATCAAGCTGCTGAAA            |
| <i>Actin</i>    | AGGTTATGCCCTTCCACACG<br>TCGAGGGCAACATACGCAAG           |
| <i>RD29A</i>    | TTTGAAAATACCAGTAGGAT<br>AGAGTAAAGAATTGGCGTTA           |
| <i>RAB18</i>    | CTGGACAAGAGAGGTTTAGA<br>TCGTCGTGTTACATCATAACA          |
| <i>PRI</i>      | TCCCTAATCCTTCCCTCTCG<br>AGGCTTGCACTGTGGTGTCC           |
| <i>PR4</i>      | CAGACCTGCCCTAATAACCT<br>TTGCTTTGACAGTTCTTGGGA          |
| <i>5' GSP</i>   | CGGAACAACAAATAGCACCCTG                                 |
| <i>5' Inner</i> | CAACCTTAGCATCCCTGCTGAGA                                |
| <i>5' Outer</i> | TGGCATCTTCTGTCCGTTTC                                   |
| <i>miR172d</i>  | GGAATCTTGATGATGCTGCAT                                  |
| <i>5.8s</i>     | GTCTGCCTGGGTGTCACGCAA                                  |

---

**Supplementary Data S1. Information for trihelix genes.**

>PtrGT1

MDNSGLGGRFLSGPNSGLLDLESPIHRHQSSQLGHPSLAHQHQVNLVGCDFNDHQPIGLSEVK  
GTPSKVYSANFGK GKAVSPFNCASSGNASEDDDDQSFMEDGNGENSTGVKGGKGS PWQRMK  
WTDNVVRLLI AVVACVGDGTLNAVEGLKRKSGLLQKKGKWKMVSKLMISKGCHVSPQQCE  
DKFNDLNKRYKRLNEILGRGTT CRVVENPVLMDSMPHLSAKAKDDVRKILGSKHLFYKEMCA  
YHNGQRIPNCQDLDLQGC SLPLERSSSKDNNGSGEDEAEGNGSDDDGDDDDDES DNEENNA  
DEDGERVGLCEGRVND EHAHLWSQSGGRNGFDVEMAAIFQDPAVSPWERKEWIKKQRLQL  
LEQRVSIQAQTFELEKQRFKWLRYSK KDKEFERLRLENEWRKLENEQSALQLRQKQLEMDF  
RSSEPSFDPACL GIDGVQGRDPIDLSRPQ

>PtrGT2

MDDDDDIQSHSNTTESSSPSPSPDGRITVTVPATATVPPTPPPQQT DNSLALV LPMKSKANGSG  
GGGREDCWSEGATAVLIDAWGERYLELSRGNLQKQHWKDV AEIVSSREDYKSAKTDIQCKN  
RIDTVKKKYKLEKAKMASGGGVSSWPFDPDLRLIGSTARVP AVASGSKFPYHFRRNQNMKAR  
IRKWGKDEDDDDDEDEEEEEEEEEEEEEEDGGWGN SIRMLTQAMLKFG EAYEQAETAQLQ  
QV VEMEKTRMKFAKELELQRMQFFMQTQMEISQLKNGRKGGSASGNHHHHHHHHHTGN NIT  
ASNNVNNSDS DN

>PtrGT3

MDKETNQECPSLRPNNSTTIKEESPRKIPRGLGAAGVIVTGTGGGGGGGDR LKRDEWSEGA V  
STLLEAYESK WILRNRAKLGHDWEDVARHVSSRANCTKSPKTQTQCKNKIESMKKRYRSES  
ATADASSWPLYPRLDLLL RGN SATAAVISSPQHQQPAIPASSNP LLLVDPTLGVPQPPPSMTPP  
PPPPSPPPQVIVIAQNSHGSNGVDRGQKEDGVDTKLSNHVSDKNAMEVTDSSTPALYSDKKK  
TRSKKLKMRKERRKWKREEWEIADSIRWLAEVVVRSEQARM DTMREVEKMRIEAEAKRGE  
MDLKRTEIIAKTQLEIAKLFAGGGKGV DSSLRIGRN

>PtrGT4

MALEQQLSLTPTQNPVDGERTNGVDTNIRDGGDDGNKAPRLPRWTRQEILVLIQGKRVAENRV  
RRGRASGMGIGSGQIEPKWASVSSYCKRHGVNRGPVQCRKRWSNL AGDFKKIKEWETSIREET  
ESFWVMRNDLRRERKLP GFFDREVYDILDGGGGTV PGLALALAPSSTAAEAEVAEEV VFD SG  
RSAAAEDGLFSDFEQEEGGGSPEAVVKEVQPIKMAV TAGVANPTPISEKQYQPAPRASQAQVPP  
NDKRPATNPEMGSASHEERKRKRFVIDGDEETISLQSHLIDV LERN GKMLTAQLEA QNTNFQLD  
REQRKDHADGLVAVLNKLANALGKIADKL

>PtrGT5

MEDLISSSVTPSTAPHSRSLPIREDCWSEEATSTLVDAWGRRYLELNRGNLRQKDWQDVADT  
VNALHGHTKKTHRTDVQCKNRIDTIKKKYKIEKSRVSSNGTLTSSWPF FERLDALIGSNFNSSI  
KKPPSPSLSPSPVALPLHPSYRRTPPVSSTPPPQPAALAV ALPQKRTL PVDDGGYFRNYSAMA  
AAAAAQESDSEEEEEEEEEEF EAGERESVEEDGE GEGIKRLAR AVERFGEVYERVESEK LKQ  
MVDLEKQRMKFAKDLEMERMRI FTETQIQLEKIKK GKRAPDNERDY

>PtrGT6

MMFSGGGEGDGLGRINMMPTAAML SPTAEISPRGPPQQPQWGQ QETKEFIGIRAELEKDFTV  
TKRNKTLWEIVSVKMREKGYRRTPEQCKCKWKNLVNRYK GKETSDPETGRQC PF FEELHAVF  
TERAKNMQRLLLESEAGSTQSRKKMKRTSGDRSSDEFSEEEDEDED DSEEEKPVR SN SRKRKV  
EKIIAEKSPRASSTVGGIQEMLKEFLQQQKMEMQWREMMERRSHERQMFEQEWRQSMEK  
LERERLMIEQAWREREEQRRIRESRAERRDALLTLLNKLIRENNI

>PtrGT7

METTPCATPKRVPPPCWTRDESLALIKAYCDKWYSVNRGNLRAADWEAVAVAVPPKSSLQCRH  
KIEKLRKRYRVEKQKCLEYPGQFFSSWDLFPLLDLSLEIGSLGSKGDQEIDKGNDVGDGFRVKT  
GDRYLLTTQKNGKTNGDLDPDEDFGLDPLAFRAAKYSKVHGGFNHGDSESGFGFKSVANK  
NLVSVAFGPKDYVGVNGKLTANVGLNCDNGGEGFYKVEKTRGGRKVMPPQGVRLPDYEMIAN  
NYGSYVRDFTKGVHSYGGFPLKSLGDGNYNTIDGKPTPDFCDNDDHVEIDYRNDKRDEFGKK  
VTNGWSYSPTGFRPKNCGTIDGNSRSNARSRAVNGSVNVGMNGIGDGVKRETDPISSLVSAIE  
QATESFVKVEMMKMDMASEIEKMRMEMGLKHNQMILESQQRIVDTLAKAMLEKKKEREKV  
EVRPPNSSRNGFSQVAAVEFERIGKSIVKEGEACFT

>PtrGT8

MDDTEDDARYPQNPYGENNQRSYGSNRHKLPGVGNATYSRPVDNQYAVSEDESDDEEEGEHE  
GIDDDHEDDDIERHPKRRKLSLVSSYEFAPLGGRNPLTDWTEHETFVLLDAWGEKFLQRGKK  
SLRSDEWQEVAEKVSDKSKIERTDTQCRNRLDTLKKKYKIERIKLAEDGGGASKWVYFKKMD  
VLMSTSAQQGGLSCGMDSGEYVSMNPRVYSNHSNGFDEMSPGNSELARDEDDSDGLPPK  
KRRLGRDCIEQSPFGLLADSIHKFSEIYEKIESSKRQQMLELEKMRMDFQRDLEMQKRQIIRA  
QAAIAKIHQVGEEDSISANSA

>PtrGT9

MEASTTFPENSNAATGNRDSDEGDEEMRVKAEEDGQHSTGNRWPKQETLALLKIRSDMDVAF  
KDSGLKAPLWEEVSKKLNELGYNRSACKCKEKFENIYKYHRRTKEGRSGRPNKTYRFFEQ  
QALDNTEVLLPPPSSDKVHTSMAAALVNPVVFIPNAVPCSIQSPGMNFVDTTSTSTASTSSEEEE  
GTRKKKQKLTGFFERLMKEVIEKQENLQNKFLAIEKCEQERIAREEAWKMQELDRIKREREL  
LVRERAIAAAKDAAVLAFQKFEQGISVQLPDNPVPMKFPDNQTPVPVSSAPVQLPKNQAVP  
VENIVKTRENSIESFVNISPSRWPKEEIEALIGLRTKLEFQYEENGPKGPLWEEISASMKCLGYD  
RSAKRCKEKWENMNKYFKRVKESNKRPPGDSKTCYPYFQQLDALYREKNRRVDGSGFELKPEE  
LLMHMMGGQDQQQPESATTEDRESENVQDQENYRDKEDGDGDRIVANDPSSMEIME

>PtrGT10

MQQGGGERGSSQSQYAVPQQQQQGDMPPLPSTSAALATHMQQQQVVEEASPISSRPATAA  
TTSGGGVMNLDEFMRLSGGGGAEDIAGEDADRTGGIASGNRWPRQETLALLQIRSEMDAA  
FRDATLKGPLWEDVSRKLAEMGYKRSACKCKEKFENVHKYKRTKEGRAGRQDGKSYRFFS  
QLEALQNTGGGGGVSSSISNVSGVAPQLIGTATTSSLDVAPVSVGIPMPIRTPPPSSQVPQASNIG  
SMFPPDLGATVARAAAAGAPVRISFSSNESSSSQSSSEDDDDDEDEGILGGQTSAMGAGTSRKRK  
RASLSSSKGETHRMMEFFEGLMKQVMQKQEQAMQHRFLEAIEKREQDRMIRDEAWKRQEMA  
RLSREHEIMAQERSISASRDAAIVAFLQKITGQTIHLPTVSIAPLVSQPQPPPTQPQQVQIAPLV  
TVSTQPPLQPQMPPLSQVTPQQNKQLPQQQHHQQQHQVHHQHQPSSISSEIVMAVPEQQIA  
PLELGGSGSEPASSRWPKEVLAALIKLRSGLETRYQEAGPKGPLWEEISAGMLRLGYKRSSKRC  
KEKWENINKYFKKVKESNKKRTEDAKTCYPFHELDALYRKKILGSSSGGAGSTSTSGFDSQIN  
RPQKQHQHQESLELDPMPPPMQQTVPQQTQATESQNKNASVDVQASNTVLAGSPFEGGN  
GGAEKKPEDIVKELMKQQGTQQQQQLMVDYDKMEEGDSENVNEDEYDEEDDGEDEEED  
EALQEERKMAYKIEFQRQNTSNATNGGGSGAPSFLAMVQ

>PtrGT11

MIGDSSVQATSSDVAATATRVATEGEGEGGGGGFGSNSAEEDKTMGVDHEGNRMNYGANRW  
PRQETLALLKIRSDMDAVFRDSGLKGPLWEEVSRKLAELGYHRSACKCKEKFENVYKYHKRT  
KEGRTGKSEGKSYKFFDELEAFQNHPPHSTQPPTLPPPLPPKAQTASATITTLPWNTNNTAIVS  
HATVPSRTNPMDIMSQSIATPTNNRAISMPPISSNPINPSQNAYPSSLQNLTTLLASSSPSSTASD  
EELEVSYKRRKRESNWKDFFERLTRDVIKKQEDLQEKFLETIEKYEHERMAREEAWRMQEMA

RINREHETLIQERSTAAAKDAAVVAFLQKISGQQNSVQTQEIPQPTTTTPTAPPSQPLQLRPPPSLA  
PVAKLEVPKRDNGDNFTVSSSSRWPKVEVQALINLRANLDVKYQENGAKGPLWEDISAGMQK  
LGYNRSARKCKEKWENINKYFKKVKESNKKRPEDSKTCPYFDQLDALYKEKNKMEITVNSDY  
AVKPTSTMEPLMVRPEQQWPFQQATQPQTIIEDNERNINIDHNIEDDDDDDDVVVDDDDVDTDE  
EDEGGGFVANKSAPLVNGDQ

>PtrGT12

MLGDSSSVLATTTLAASGGGGVGNREAPPLTGGHHEGRNIDVGGEDDKGVIEGHRGIGGNR  
WPRQETMALLKIRSDMDVAFRDASVKGPLWEDVSRKLAELGYNRSACKCKEFENVYKYHK  
RTKDRSGKQEGKTYRFFDQLEAFQSHPPSLSSPLPPQPTKPHIPPANTIAMPVVNPSNVVGT  
RNTVPSTAAATLATNTSQGIVTSAINLAVPPFPSTDPPTICPPSQATNPTNHPRTNIPSSFPNFSSDLN  
SNSTSSSTSSDVELQGRKRKRKWKDFFERLMTEVIQKQEETQNKFLEAIKRENERMVREES  
WRMQEMARINREREISAQERSIAATKDAAVMAFLQKLSEQQNPGQVQNNPPPTQPPPPALPPIS  
QQTPTPTPPPLPVAQVPPPQVANLDMKSDNGDQNFMSASSSRWPKVEVEALIGLRTNLDCK  
YQENGPKGPLWEEISAGMRKLGYNRNRKCKEKWENINKYFKKVKESKRRPEDSKTCPYFH  
QLDALYKEKNKIDGPSNSTHHMKPQNSVPLMVLPEQQWPPAQEHRPDSMMGDLESDDNQN  
QEDGDDKFMDEDEDEASGYEIVANKQTSMTAG

>PtrGT13

MEGNLSQGGMIPGGAPFGGLDLQGSMRVHHQAQHPHTMHHHQHPLHRQGSSTLTSVEEGFPL  
TMGFMHNSDQNISMTDYNKGDRGKNSVSEDEPSYTEEGADGHNDAITGKKGTPWQRVKW  
TDKMVRLITAVSYIGEDGTSDCGGMRKFTVLQKKGWKSVSKVMAERGFHVSPQQCED  
KFNDLNKRYKRLNDMLGRGTSCQVVENPALLDVIDYLTEKEKDDVRKILNSKHLFYEEMCSY  
HNGNRLHLPALQRSLLALRSRDDHDNDARRHQHDDLDEDDQEIETDDHDEFEEENHAS  
HGDCRGIHGVGGSAKRPRQGGHEDAFSPESKAVWLQKQWMESRTLQLEERKLQIQEML  
ELEKQRFKWQRFKRDRELEKLRMENERIKLENEQMALELKRKEMGADFN

>PtrGT14

MSAPIKTGSPSSPQDLTPLQTTAQQLPAPPTHPTNPRRLPPCWTPEDETVALIDAYRDKWYTL  
RRGNLKANHWQEVADAVARRCPDASPKTAVQCRHKMEKLRKRYRTEIQRARSMPVSRFTSS  
WVHFKRMDAMEKGPQAKADYNSESEGDDNDDNEDDGDIRGSYLENCRNAKNFMNTRSIQ  
KLYGNGIGNPGNGDNNGLSGGNSSLGSGNAGGFRIPTGVSVAQPGPKFYAKTEQKHGGSP  
NMGVNASDPYPKPKYGGGVGTSSRVMRGSEEMGRKREREPMEELVAVKVLGDGFVRMEQ  
MKMEMAREMETMRMEMEMKRTEMILDSQQRIVEAFKALSEKKRKRMPSPES

>PtrGT15

MSTPSPSPSPPPHSPPTNPTPLSSKKTQPLPWITHQETIHLIQAYQEKWYSLKRGQLKASQWEEV  
AVTVAARCGYDYNHPSKSAVQCRHKMEKLRRRYRDEKRVMALGGTCYWQYFDLMDSLERG  
PLPISAQPLARVPCQENYHTRNRNNGVLGEYDDDKGEDEDDDDDEDYGYRSKLRSRINYL  
KPSIVNRYAGGGPSGVSREAEEKRKRREEVEEEEEEEEEEGEGVEMGLAQIKAFSERMVKL  
ERKKLEVMKETERSRMEMENKKLEMILDSHSHKIVHMIGEAFGL

>PtrGT16

MDDTEDDARYPPNPYGENNQKSYGSNRHKL LAGNAMYLREVDDQYSIDEDDSDEEEDEH  
ELGVEDGENNQKTGIHYEGKDVDEEEEEEEGVDDEDEDDNQNRRIDEDEDDNEKYNM  
RIDDDDDDGDIERHPKKQKLKSLVSSYEFAPRVPAPHVAVPAGPKPSVGGRNPLTDWTERETV  
LLDAWGDKFLQRGKSLRSDEWQEVAEKVSEKSKIERTDTQCRNRLDTLKKKYKVEKIKLAE  
AGGGASKWVYFKLDILMSTSAQQGGLSCGLDSGEYVFMNSKAYSNHANGLDGMRDSPGNS  
ESAHDDDDSDGLPPKKRRLGRESRNCNEQSSFGLLADSIQKFSEIYEKIESSKRQQMLELEKMK

MDFQRDLEMEKRQIIERAKAEIAKIHQDSEDEDTMSANSA

>PtrGT17

MSTAPSSDFTTKRVPPPCWTQEESLALIKAYRDKWYSVNRGNLRVADWEAVAAVPLKSSLQC  
RHKIEKLKRYRAEKQKCLKHPGRFFSSWDLFPLDLSMEIGSLGSKVEQIDKGNDAAGDGCV  
KTLGDRYLLTAQKNGKINGDLDPDEVFDLDPDFALRARKYSKVDGGFSVSKDSGSGFGVSSVA  
FRPNDYVGVNGNIKANVGFNCDHGGEVVRLPDHGMMADHYGSYNDFSKGVVDVYEGFPLK  
SLGDRNLPMQGLNPKNYKKIDRKPTPDFCDDHVEIDYRIDKRDRFGKKVNDGWSSSFPGFIP  
NCCGNIDGKSRSDRSRALKGSVNVGTNGIGDGVRRREADSVALLVSAIEQATESFVKVEMMK  
MDMAMEIEKMRMEMGLKHNQMILESQQQIVDALAKAMLEKKKRRKVEVLSSNSNRNGYTQ  
VAAVDCESIGKSSIVKESEACVS

>PtrGT18

MMFRSGGEGDAGLGWINMMPTAAMLSPAEISPRGPAPPQHPQWGLQETKEFIGIRAGLEKD  
FAVTKRNETLWEIVSAKMREKGYRRTPEQCKCKWKNLVS LYK GKETS DPETGRQCPFFEEHLH  
EVFTERAKNMQRLLLESEAGSTQSRKKVKRINGDRSSDELSEDEDEDESEEEKPARNNSRKRK  
GEKNVAEKSPRSPSSSFGGVQEMLKEFFQQQKMEMQWRELMEKRAHERQMFEQEWRSSM  
DKLERERLMIEQAWREREEQRRIREESRAERRDALLTALLNKLISENTMKD

>PtrGT19

MGDLIESSVTPSTTPHSRPLPIREDCWSEEATSTLVDAGWRRYLELNRGNLRQKDWQDVADA  
VNALHGHTKKTYRTDVQCKNRIDTIKKKYKIEKSHVSSNGTLTSSWPFFERLDALIGSNFNSS  
GKHLSPSPVALPLPPSYRRTPVVSSTPPPQPPALAVALPQKRPLPVDDDDYFRRNYSAMAAAA  
AAVESDSEDEDEEFEGGERERAEDVEGEGIKRLALAIERFGEVYERVESEKLLQMV DLEKQ  
RMKFAKDLEMERMRIFTETQVQLEKIKKGRAPEDY

>PtrGT20

MALEQQLNLTPTQNSVDGERTNGVDTSIRDGGDDGNKAPRLPRWTRQEILVLIQGRVAENRV  
RRGRASGMGIGPGQVEPKWASVSTYCKKHGVNRGPVQCRKRWSNLAGDYKKIKWEASIRD  
ETESFWFMRNDLRRKKLPGFFDREVYDILDGGGGTVQGLALALAPSSAAVEAETIAEGV VFD  
SGRSAAAEDGLFSDFEQEEGGRSPEAVVKELQPIKA AVA IPTPISEKQYQPAPQASQAQGLNDK  
RPSTNPEMGSASHEDRKRKRFAIDGGEETISSHSHLIHVLERNGKMLTAQLEA QNTNFQLDREQ  
RKDHADGLVAVLNKLADALGKIADKL

>PtrGT21

MDKETNRESPLLPSNTTTIKEESPRKLLGGTGAAGVVVSGGGGGGGDRLKRDEWSEGAVSTL  
LEAYENKWILRNRAKLGHDWEDVAHHVSSRANCTKSPKTQTQCKNKIESMKRYRSESSTA  
DASSWPLYPRLDLLLRGNSATAAVTSPSQVPPQHQQPSIPTSANPPLMLLMDQSPLAVTQPPAPA  
PPPPPLPPPLPHQTIGTAQNSHGSNGVDRGAKGDGMDTKLSDHVSDKNAMDTDSSTPALYSDK  
EKLRSKLKKKMEKRKRKREEWEMADSIRWLAEVVVRSEQARMDTMRELEKMRIEAEAK  
RGEMDLKRTEIIANTQLEIAKLFAGVGRGVDSSLRIGKT

>PtrGT22

MEDDDEIQSHSNTTEYSSPSPPPNGRITVSAPA AVHPQAPPPPQNNKNRLALVLPKPKVNG  
GGGGGGREDWCWSEGATAVLIDAWGERYLELSRGNLQKHWKEVAEIVSSREDYSKSSKTDIQ  
CKNRIDTVKKKYKLEKAKIASGGGPGSWPFFDPLDRLIGSTARIPVVGNGNVGSKIPTRVRS  
RRGGVNQYHFRNQNVKIRILKHEDDEDDEEGEEEGGAESDDSFPPMKRRRVVVEREVRGK  
VGKEKRGGGWGNSIRMLTQAMVKFGEAYEQAESA KLQQV VEMEKTRMEFVKELELQRMQF  
FMQTQMGISQLKNARRGGNATS NHYHHQYHRHHTGNNINASNNVNNSDSDN

>PtrGT23

MDNSGLRGRFLSDSSGGLLDLESPIHRHQSSQLGHPSLAHQHMNVMGCFDNDHQPSGLME  
MKGSTSKGYLVNFGKGRAASPFNGAHSGDGEDDDQSFMEDGNGENSTGAKGKQGSPWQR  
MKWTDNIVRLLISVVACVGDDDTFDGTGGLKRKSGLLQKKGKWKTVSKLMIGKGCHVSPQQ  
CEDKFNDLNKRYKRLNEILGRGTSCRVENPALMDSMPHLSAKAKDDVRKILSSKHLFYKEIC  
AYHNGQRIPNCQDFDLQGCSPLERCCKDMNGSGGDEVEGNDDSDDESNEADNNADENG  
ESVGQLCERIVNEEHSHLCSQSGRQNSFGVEMTAIFQDTNVPSPWERKEWIKKQRLQLLEQRVN  
IKAQAFELEKQQFKWLRYSKDKKEFERLRLENEMMRLNRSQAFQLRQKQLEMGLRSSEPA  
YDPTSLGIDRVQGRDQIDLGRHH

>PtrGT24

MFEGVADQFHQFIASRTTSLPLPSLSPPLHGSSNTTNFSPFYPTATAATTSQVPLQPNLLHSLH  
QGSPTNKNDEKQENNLMMAMNLKFERERSIPELVNPWSNDEVLP LLRIRSSMDNWFPEFTWEH  
ASSRNLAEVGFKRSTKWKKEFEEESGYFN SNIDIYSKNYRASFSFEFEEIYHGDQNPDQOEATA  
GEKKIRKPSSEDEQQDKMGQNLEETRIDQTVGNQSVEDNDGKLEQFEKSKRKKRREKKFEM  
FKGICEDIVNKMMAQQEEKHNKLEDIVKRDEEKFAREEAWKKLEMDRINKELELRAHEQAL  
AGDRLDTLIKFLKITSGDSYAEILGETSAPDVVKVPKCSNASTSSSLLLAQNPNPASQTSCEQ  
LETPTSSTTTLDHQKSTSMPAKSNTSCTENQEPQNPSTLAPNIPQAPTTSSTLALAPQNPNSLN  
SHNSPSGPSSILPMYKVVQAKSTSNEDDDIGKRWRPRDEV LALINLRCSLYNNNEDKEGSAKAPV  
WERISQGMLELGYKRS AKRCKQK WENINKYFRKTKDASKKRYINSRTSPYFHLSTLYNHGTL  
VAPKNRSASPENQSNLSETRHSSSSSQNGTSNSAMHVVEGEKNKVQVPPDFEF

>PtrGT25

MIPGGAPFGGPD LQGS MRVHHQGHPIVHHHQHPHRQGSSTHPSVHDGFP LTMGAMHKSD  
QNMSMTDYNKGDGRKNSVSEDEPSYTEEGADGHSDVRRGKKGTPWHRVKWTDK MVRLLI  
TAVSYIGEDATSDCGGGMRRRFTVLQKKGKWKSVSKVMAERGFHVSPQQCEDKFNDLNKRY  
KRLNDMLGRGTSCQVVENPALLDVIDYLTEKDKDDVRKILSSKHLFYEEMCSYHNGNRLHLP  
HDPALQRSLLALRSRDDHDNDVRRNQLDDLEDDQEIETDDHDEFGENHASHGDSRGIHG  
VLGGS AKRPRPGGHEDVYFGNSSQDPNKGSSYSHPQIAQVDMNQVSPESSRASWLKQWM  
ESRTLELEEQLKIQEEMLELEKQRFKWQRFSKKRDRELEKLRMENERMKLENERMTLELKR  
KEMGADFN

>PtrGT26

MLGDSSSVLATTTTSTPGGGGGGGGAGDHKEAPPLTGGNHEGGSNDVGG EEDKGKIEGDRSY  
GGRWPRQETLALLKIRSGMDVAFRDASVKGPLWEEVSRKLAELGYNRSGKKCKEKFENVYK  
YHKRTKDGR TGKQEGKTYRFFDQLEAFESHPPSLSSPLSLPPQPPKAPTAVTAIAMPVVNPSPN  
IVRASHSTVPSTAAATLATNMSQGIVTSAIYLTVPFPSTNPTILPPSQATNPTNPPHTNIPPSFPN  
FSPDLISNSTSSSTSSDVELQERRRKRKRWKDFFERLMKEVIQKQEEMQKKFLEAIERREHERM  
VREESWRMQEMTRINREREILAQERSVAASKDAAVMAFLQKLSEEQNPQIQNNPPPSQPPRPP  
APPPILQLVPTPPPPLPQAVANVDMIMKSDNGDQNF TASPSTASPSRWPKVEVEALIRIRTNLD  
CKYQDNGPKGPLWEEISARMRKLGYNRNAKRCKEKWENINKYFKKVESKKKRPEDSKTCP  
YFQQLDALYKEKNKIDGPSNMKPENSVPLMVRPEQQWPPPQEH RPDSEMEDLESDDHQNH  
DEDDKNMDEDEEEDEASGYEVVANKQTSMTNDE

>PtrGT27

MLGDSSVLASSSDVATTATRVVPEGGEVCEVG DAGFGSNSTEEDKNMGGDHEGDRMNYGA  
NRWPRQETLALLKIRSAMDAVFRDSSLKGPLWEEVSRKLAELGYHRS AKKCKEKFENLYKYH  
KRTKEGRTGKSEGKTYKFFDELEAFQNHSHSAQPPTILAPPLPPPKAQTPTATTATLPWTNSPA  
IVSHVTVQSTTNPIDILSQGIATPTTIHSTISPMPLSSNSLNSQDTLPSSLQNLATHLFSSTSSSTA



SDEKLEGSRKRKRKRNRNWKDFLRLTRDVIKKQEDLQKKFLETVEKCEHERMAREDAWRMKE  
MARMNRQHEILIQERSTAAAKDAAVFAFLQKISGQQNSTETQAIPQPKLTPPPTQPPQPRPPPTS  
LEPVTNLVSKWDNGENVTVSSSRWPKVEVQALISLRADLDIKYQEHGAKGPLWEDISAGM  
QKLGYNRSARKCKEKWENINKYFKKVKESNRKRPGDSKTCOPYFDQLDALYKEKNKMESRVS  
TGYAVKPISTMEPLMVSPEQQCPFEQANQPETIIEDNERDINIDHNIEEDDDDMDDDEEEDEG  
VGFEVVANRPASLTNGE

>PtrGT28

MDLLAADDRQIRNPNDPFLHLIPFPPTGNFDISTSAAAVVGSSDVDSLLPQKLRPIRGNRVPSPG  
SGEDGREKLWGFVSGEASDVAVNGGGGLGLCSCDGNADDSSVGAGESVGRKRKRRSKRKIEK  
FLESLVMKVMKQEMHKQLVEMIESRERETMIREEAWKQEMERMERDNEARAQETSRL  
ALISFIQNMGTGHLQVTGSKGTNIWDAISDGMCMGYNSTAKNCKEKWENINKHFKKSVGSVV  
KNPFENITVNPYFHELDVLYNNGFVNLGNGSTNTGKQANCTLGKG

>PtrGT29

MEGLHHHLHHHQQQIQQHHISVNVDTSDRFPQWSIQETKEFLMIRAELDPTFMEKKRNKVL  
WEVISKNMKEKGYNRSAEQCKCKWKNLVTRYKGYETIEPESMRHQFPFYNELQAIFTSRMQR  
MLWVDAEGAASGSKKAAQLSSDEEEDNEEISEGEKGSRRKRIKKGKAVGGASCSTGNSNSLR  
ETLEDFMKQQMQMEMQWRETFEARENERRMKEMEWQRIMEGIENERTTMDRRRWREIEEQRR  
VREEARAEKRDALITALLNKLRRDM

>PtrGT30

MASSCEDDFSLGDDNHHHHIHPYRYPTKSTPIHAPPESVLPLDGEEDRQDNNETDSAFADV  
NPYSDNETSKRSEREGEIDGGETPYNIYKRGRSGGGEYRKDREEWSDVAIGCLLDAYMEKFTQ  
LSRGNLRGRDWEEVAAMVKQKSVQCKNKVDNLKKRYKLERHRITGSSISTSHWPWFQKM  
EDIVGNSLTIKVAPPAPAPADEDNNGGGASSASVSRQSKRYANTIASPAGQTNMMPKSISKTR  
WRRVILKISGVALAGTGPNNDPKVMTLIAREVAMACQLGLEIAIVVGARNFFCGNTWVTATGS  
HRRTAYQIGMMASVMNSLLLQSALEKTGIQTRVQTAFAHQEVSEPYSRQRAIRHLEKGRVVIF  
GGIGAGTGNPLFSTDTAAVQASEIHAEAVLKGTVNDGVYDCHSPDSNFIFEHISIRDLVSRGAT  
SMDMTALTFCENNIPVVFNLLEPGNISKALCGEQVGTLLIDQTGRIG

>PtrGT31

MGSGILGLELPLHQQNPQNPHHLQHPQIVAYAHHESDHHQHSQQSAKHAYPFASTKPKQLSP  
LSNEDEPSFTGDDSTTDGNRKISPWQRMKWTNDNMVRLIMAVFYIGDEVGSEVSDPIGKKKPG  
GLAQKKGKWKSVSRAMMEKGFYVSPQQCEDKFNLDLNKRYKRVNDILGKGTTACRVVENQSL  
DTMDLSPKMKDEVKLLNSKHLFFREMCAVHNSCGHAGVASGINNSPEMATDPSHAHQHQAT  
QQQQYQRCSTENAVVTNSRTETEGSKMAKMARNEEDDHDESEDEDDYVEDEEEEDD  
DDERDDDEEDYEENEDEAVEGNSRHQNGHGHGDEDDHDEKSSRKRPRKEVFSATSSLMQQL  
NGEIMNVLRDGAKSSWEKNQWMKLMQLEEQQVNYQCQAFELEKQRLKWVRFSSKKERE  
MERAKLENERKRENERMVLTVRKKELLELDTTHQQQLPSNKRSDPSSIAG

>PtrGT32

MQPSYGLPNIDHHQQQQQRQHLMEDDYSCSPSVLPISNLQNLNYPYQPHLHHYLQQHKHP  
HQVLLQQHHQLFYFPQQQQVQGSQDQVNPVSLFVNFVWGRDYEDSGDKKAGALNNQEE  
AACTTTNTTTFLDGNVHSNPPHAILMPHSWHPREDSTTLKEPFWKQLNKQRSSEEKEINESK  
TSYFSPLEMEQVDESSEGCNLESKFPLFNLQAIYSLAQIAEANQTGSGSVLTCDNSPTNAG  
LSMPCNASNGQNVGACGAANNVIGVDRGSENSIGEEASLRKCRRRKRKGLKEKLNIAAGFF  
ENSVKVMNHQEMLHRKFLEVIERMDKERAEREATWRRQEAEKYSREAISSLAHERASASSRE  
AQIISYIEKITGQSINLLTRMAPPLQPEISNEPIKEITPTKTDSSHKWPKDEVEALIQVRSRIEIKF

QEPGLKGPLWEEVSSLMSSMGYQRS AKRC KEK WENINKYFRK ARES PKRGS ARSKTCSYFNQ  
LDQLYSGTLINYPANTTDM PSSGIEFGIKKQGYTELFEVFSVRRDYLANVRNPLGVSVISSEMGS  
SRSEFDGFS DQNT ELEE GSSE QDIEAYKDDKQKDG EQQNGGGGGDEEIEIEN

>PtrGT33

MEVIVNKKKRRKEQRESKNNNQLRVSSSTPRTRSQVSPEWTTKEALILVNEIAAVEKDCLKALS  
TYQKWKIIVDNCVVL DVARNLNQCRTKWN SLVNEYNLIK NWDKESERSDFYWSLESERRRE  
FGLPENFNDEL FRAIDDYMWCHKEHPD TDPDPDPD TDSEKPDLLHAITNP GTKKQRWR SKS  
LRTPMEEKTHKCCREDNSQTIHAE EK PQERCVEENSQIYCTVEKPQRVHAE EEEHQESQVQEST  
QIYNAGGKLQTIHAEEDPQESCAEEEPHTIHA EEEPEESPAEEHPQCCSKEKPRAIHLEETQER  
YLEENHQTCTNEKPQSILAETQLQESHEEEKPQKCRREN SQNAHGDEKPKIHRGRKKMPS  
TEEMKQMMVEKLHENAEMIQAVVNGNFP EMADLEAADSKNIEGFKTDLIRRQGDKLIACLQN  
IVNSINQFPCLLQECD

>PtrGT34

MSEHHHQYGM PDLRQLVAGRSHFQGTQQGGEPFFVQSRNLAAPQTHHFESIMVGHEAMLSSG  
LVKLGGHDRYCTNATNINTTNSATIGTSSSAGVGTLYGVEMESATTAGWIGNDGGNNSRWPR  
QETLTLLEIRSRLDSRFKEANQKGPLWDEVSRI MAEEHGYHRSGKKCREKFENLYKYKKTKE  
GKAGRQDGKHYRFFRQLEALYGEPSNQASASETHFVNNTLLYQAPMSNTINQESQETFQENKH  
SESLSFSNTSEFETSSSENDDLSAIAYNMMNRST EKQKGINESQSLARPKKSWKLKVDFVD  
SQMRKLM EKQDAWMEKMLKTIEDREHERMCREEEWTKQELARFDQEHEFWAKERAWIEAR  
DAALMEALKKHTEKGLELSSSVEQI AVATQRHNKNPDS AVAKKI QKDKFNITWTEPEILSFIQL  
RTSMDSRFQENGYSNEGLWEEIAAEMASLG YDRSVDECKEKWESMNIYFNMTTESNKKRKE  
DLRTSNYFQQL ESYNGMNSSPSNSYVGSQVNDNSCFQVQINEGDQHLWNTNKFDLKL NKEKN  
QQQLWHNK

>PtrGT35

MATDDFPLIDEPPP PPRHPYSVTTTGDY YSDHDKSAATPSSKR NQQNHYYNNNKR SKSNSI  
TEIESCDYRDYRKDREEWSDAAISCLLEAYTEKY NQLNRGNLRGRDWEEVAEAVSERGGSNK  
KSVEQCKNKIDNLKKRYKVELQRISGSGSSWHWFKHIEAIMGNACNGKSGGGGESDGGGGG  
GSGGNVNA AVKQVKRYTSGSAAFANTLKT KPVPNLKWRRVVFKISGSALAGNCQNIDPKVAM  
QIAREVATASRGGLEIAIVLGGRNFFCGDSWISATGLERPTAYQISM MATVMNSILLQSALEKHG  
VQARVQSAFAMPELAEPYSRQRAIRHLEKGRVVIFGGAGAGAGAGAGNPLFTTDTAAALRASE  
SIPLLLAFIISCVLLFTGNLDACFFYNVFWLSVNADALLKGTTNVDGVYDNHAGNSNAILDHIS  
FREVVSRGVTSM DMMAIT YCEENGIPVVIFNLLEPGNISRALCGDQVGT LIDQAGRIS

>PtrGT36

MDPSPSAAITRPHHGGREDCWSDGATGTLVEAWGDRYINLNRGNLRQKDWKEVADAVNNRQ  
NGVKPRKTDIQCKNRIDTLKKKYKIEKSKPPPSTWPFYRLDSL LGTNSNATNTFKKPTSVTFT  
VKSKTKPQNDVYPGLASCGESSDDDDMAWFDERVKKKRHRMEDVDLSDGAACRELARAIL  
KFGEIYERIESSKQQQMIELEKQRMEFTKEVEFERMNL FVDAQLELKKKSF SRDKFASSSVVLQ  
V

>PtrGT37

MYLSEKPRPLDFYKEEVGPSSSRDNMIIEVVSSNGDLPPLHLHPITAATNPHQMILGESSGDDNH  
EVKAPKKRAETWVQDETRSLIGFRREMDGLFNTSKSNKHLWEQISTKMRDKGFDRSPTMCTD  
KWRNLLKEFKKAKHQDRGSGSAKMSYYKEIDEILGRNKNSQYKCPTPKVDSYMQFSDKGF  
EDTSISFGPVEASARPTLNLERRLDHDGHPLAITAADAVAASGVPPWNWRETPGNGAESQSGF  
GRVISVKS GDYTRRIGIDGTTDAIREAIKSAFRLRTRKRAF WLEDEDQIIRALDRDMPLGNYTLHL

DEGLAIKVCLYDQSDHIPMHTEEKIFYTEDDYRDFLSRRGWTCLREFDGYRNIDSMDDL RHDA  
IYRGVS

>PtrGT38

MYSSEKPRPLDFYKEE VTPSSRDNMIEEVSSNGDLPPHLLPTTTNTNPHQMILGDSSGDDNHE  
VKAPKKRAETWVQDETRSLIGLRREMDGLFNTSKSNKHLWEQISAKMREKGFDRSPTMCTDK  
WRNLLKEFKKAKHKDRGSGSAKMSYYKEIDEILRERNKNPQYKSPIPSKVDSYMQFADKGF  
DTSISFGPVEASPRPTLNLERLDHHDGHPLAITAADAVAASGVPAWNWRETTPGNGAENQSYGG  
RVISVKYGDYTRRIGVDGTADAIKEAIKSAFRLRSKRAFWEDEDQIIRSLDRDMPPGNYTLHL  
DEGLAIKVCLYDESEHMPVHTEEKIFYTEDDYREFLSRRGWTCLREFDGYRSIDSMDDL RHDA  
IYRGVS

>PtrGT39

MAPPWLSRRLLEWRPYTLIEAWGDRYINPNRGNVQKDWKEVADTVNNRQNGVKPKKTDV  
QCKNRIVMLKKKYKIEKSKPPLSWPLCNRLDSLIGTNSNTTNDKKPTSFTVKSKKKPKKRM  
FSGLASYSSESSDDDEDDMAWFEERLKKKRHRMEDVGLSDGAACRELARAILKFG EIPERIESS  
RQRQMIELEKQRMEFTKEVEFERLNMVDAQLDHTKKSFKRDKFTSSSVLPVVCGRGRQEMWI  
FRDLSLQLNYFDK FVVHTDIYDSWIFPYN

>PtrGT40

MSTDDFPLLDAPPHPTTRHPDAASVTTTGDYYYYSDHDKSSATPSSKR NHQNHYYNNNNKRS  
KSNSNTELESSDYRDYRKDREEWSDTAISCLLEAYTEKFNQLNRGNLRGRDWEEVAEAVSERG  
GSNNKKSVEQCKNKIDNLKKRYKVELQRISGSGSSWHWFKHIEVIMGNACNGKSSGGGAAAA  
AGGDSEGGGGSGCNANVVVKQVKRYTSGSAAFANSLKTKPVTNLKWRRVVFKISGSALAG  
NCQNIDPKVAMQIAQEVATASRVGLEIAIVLGGRNFFCGESWISATGLERPTACQIGMMATVMN  
SVLLQSALEKHGVQARVQSAFAMPELAEPYSRQRAIRHLEKGRVVIFGGV GAGAGNPLFTTDT  
AAALRASEINADALLKGTIVNGVYD SHAGSSNIILDHISFRDVVSRGATSMDDMAITYCEENGI  
PVVVFNLLEPGNISRALCGDQVGT LIDQAGRIS

>PtrGT41

MSEHHHQYGLPDLRQLVAGRAHFQGTQQGNEPFFVQSRNLVPQTHHFESIMVGHEAMLPSGL  
VKLGRRHHDHYCTNATNITNTITSATIGTSSSAGAGTLYGVEMENATAAGWIGNDGGNSR  
WPRQETLTLLEIRSRLDSRFKEANQKGPLWDEVSRIMAEHGYQRSKCKREK FENLYKYYKK  
TKEGKAGRQDGKHYRFFRQLEALYGEPSNQAPASETHFANNLLYQTPLSNTINQESQETFQEN  
KHSELSFSNTSEFETSSSENDDLSAIAYNMMNRSTKQKGVNESQSLAGPKKSWRTKVED  
FVDSQMRKLMKQDAWMEKMLKTIEDREYERMCREEEWTKQELARFDREHEFWAKERAWI  
ESRDSALMEALKKHA EKGP ELSVVEHIAVATQRHNNNQDSTS AKKI QKDKFNIIWTEPEILSF  
IQLRTSMESRFQESGYSNEGLWEEIAEEMASLGYDRSVDECKEKWESMNIYLNMTTESNKKR  
KDQDLRTNDYFQLLESYNGMNSSPSNSYLGTVNDNSCFVQVINEGDQQQHLWNTNKFDLK  
LNKEKNQQVWHK

>PtrGT42

MQLGLLGGFSLYCTSSRKPLKTTSPNMAAAFSALSSCPYTFFCRPSSTKLCVSCSAGSPTTTTIG  
SRGTKAPPRKRTGRKEGTGKSMEDSVKRKMEQFYEGPDGPPLRIVPIGGLGEIGMNCMLVGN  
YDRYILIDAGVMFPDYDELGVQKIIPDTTFIRRWKHKIEAVIITHGHEDHIGALPWVVPALDHNT  
PIYASSFTMELIKKRLKENGIFVPSRLKVFKTKRKFTAGPFEIEPIRVTHSIPDCCGLVLRCADGTI  
LHTGDWKIDESPLDGKVFDR ETLEELSKEGVTLMMSDSTNVLSPGRTISESVVADALLRRISAA  
KGRITTFASNIHRLG SVKAAADLTGRKLVFVGM SLR TYLDAAWKDGKAPIDPSTLVKVEDID  
SYAPKDLLIVTTGSQAEPRAALNLASYGSSSHAFKLNNEEDVILYSAKVIPGNESRVMKMMNRISE

IGSTIVMGKNELLHTSGHGYRGELEEVLKIVKPQHFLPIHGELLFLKEHELLGKSTGIQHTTVIK  
NGEMLGVSHLRNRRVLSNGFVSLGKENLQLMYNDGDKAFGTSTELCIDERLKIASDGIVVVS  
MEILRPQNLDGQVEKSLKGGKIKITRCLWLDKGGKLLDALHKAHAALSSCPVNCPLTHMERTV  
SEMLRKMVRKYSGRPEVIAIAVENPAAVLSDELNSRLSGNSHVGFGISALRKIVDGHPKGNQ  
VDRKQPDGNGYAHLEKTSPQNLEVDGIEFERELPKEEGTSSSPNLAEGHSSASEDQDDFKSSV  
PSSSPVNELVKSDES LVPPEQMNKLKEDVMDSSDDLLENENSRLKRKSVKRNKWKPEEV  
KSLIKMRGELHSRFQVVRGRMALWEEISTNLMADGINRSPGQCKSLWTSLVQKYEESKNGKK  
GKKAWPYFEDMDNILSDSETMATK

>PtrGT43

MMADQGGKSLIREYKKGWTVSETMVLIEAKRMDDERMKRSDSAEGRSKPTELRWKWVE  
DYCWKQECLRSQNQCNDKWDNLMDYKQVRYERKIAETGERNGGSYWKLEKNERKERN  
LPSNMLPQIYEELVEVVERRGGQQRMLTAAGGSGSNPNTSYVVERPITDVQPSVLPPLLQHQVS  
AAPTPALPLPPPCPPPSQQPQAQPPPIQFPEPFTLVLIGLVPFHVLEMCDSSSDTSEYSNSPA  
KRRRRGGGGEGTSGGTASASTSHEVGTAKSASIIAEAIQACDEREERRHRDLLSLHERRLKI  
EESKTEINRQGISGLVDAINKLANSILALASHKNQSSGPK

>PtrGT44

MGENKGETTKKQQQQQLSSSTSPSPKGPPIESTELRSLHHQQTSAVVTGAPFIPAPLFPVIGATS  
SPFEQHFETVNPKRARYSSAQWKLPSASQQQQPPTQAQMATVVSSEATPSLITNPTQQKQPR  
TAEASSSDTNSSPLRSPVPSLSAASAQETSKPEGEPHQHQFRKGKYVSPVWKPNEMLWLARAW  
RFQYQGGSDLTSRVEQLPETTTGQVTSGDTAIAVQSTRGKTRADKDREVAEFLNRHDVHRDAK  
TAGTKWDNMLGEFRKVEWERGDKREQMGSYFRLSPYERKAHRLPASFDEEVFEELSQFM  
GPKMRTQSRGPSLSGSGDDSSRGTSLAAARALPPPPFKEDDLSLSGRTRQLVLTSGGEAYFHG  
TRGSLGFDTAVDAAGSSSTKELRRIGKVRMTWEESVSLWGEEGHRGRVRLQGSFLNA  
DELTFDDSMVACTMEAFEDGALKGFSVDKVFSGQQIKVFGRRKPSASVTPSGFTEERVQLPL  
TEPSIRLPPWEFQDPTEYYVGC LRVPTTLPSLFELSWYLQEPPEELRFPLRRDVYRDLPGQKE  
LFFTISNDPLDCRGITYDILSSIIRTNPSISGATSSSRDSFIGVWDDCINRIVSKFCSVEVVIVRKQPS  
SPMVDTLQDEWPVNTGFVRNFC LWRGEETDQLREGQVDPSSSIIEKLLWTYLDLPYILGYAV  
GYSVTFCALCRSQDRIIRTDLYSLDLSSPVERLKALVPCYRVAGLLPLLADRCFNNFNNGGTYK  
QLAFSDFERVDMGNMIMTPNTVTRLFSSRRKWA AVKEIYDCLDHRIPHAEFIYRSSEKDLA  
LVFKPRGLKFKPNNCEQLVEALKYVTQALVALHDLFSMHRDLSWDKVMRRSDSENEWFLSGF  
DDAVGAPQLNPVHGIGEARGRHAPEMGRGMHGKVDVWGVGHLVRTCGLGPNGVPKILREL  
QNRCLDQNPEQRPTAACDYHLLQVQSSLQSSSPGVY

>PtrGT45

MFEGVPEQFHQFIASRTTSLPPPGLSFLLQGSSNTTNFSPFYPTTSSQVPLQPNLLHPILHQG  
APTNDGGEKQENNLVAMNMDQFERERSMPELVNPWSNDEVLALLRIRSSMETWFPEFTWEHV  
SRKLAEAGFKRSAEKCKEKFEESRYFNISNINYNKNYRASFSLEEEIYHGDQNPHEVTAGEK  
NKKIDKPGTEDEEQDKMRQNLEETRIDQTVGNQTDQDNNGKLALVEKSKSNKRKREKKFE  
MFKRLCEDIVNTMMAQQEEMHNKLEDIVKRDEEKVAKEEARKKLEMDRINKELRAHEQ  
ALANDRQATLIRFLKFTSSDSSVEILGEKIAPDPVNPVNSSNASSSSSLVLEQNPNPASQTSNES  
QLKTATSSATALDHQKSTSILAKTNTSWTENQEPQNPSTLARNIPQVPTTSSTLAVPAAPQNP  
FLNSHSSSTGPPNTPSHNKVQAKSTYKDDIGKRWPRDEV LALINLRCSLYNNNEDKEGSARA  
PLWERISQGMLESYKRS AKRCKEKWENINKYFRKTKDVNKKRSIDSRTCPYFHLSTLYNQG  
TLVAPDNRSASPENRSSLPETRHSSSSQNGTNSSTLHVGDGKEMVQRVTCEDGGVAAGMYCF  
ASHENAGTELELL

>PtrGT46

MSTPPNTGSPSPQDLTPLQITALQALPAPPTQPSTNPRRLPPPCWTPDETVALIDAYRDKWYTL  
RRGNLKANHWQEVADAVARRCPAASPCKTAVQCRHKMEKLRKRYRTEIQRARSMPVSRFASS  
WVHFKRMDGMEKGPQAKADYNSESEENYRTAGNVMNTRSIQKLYRNGMGNPGTGSNNGL  
SGGNSSSGNAGGFRIPTGVSIAQPGPKFYAKPEQKYGGGSPMGVNASPNPNLKPNYGGMGS  
SSRVMRGGGEMGKKREREPMEELVAAIKVLGDGFVRMEQMKMEMAREMETMRMEMEMKR  
TEMILESQQRIVEAFAKALSEKKRPRKRMPSPE

>PtrGT47

MAAAFSALSISPYTLVCRHNSTKHSISCSTASPTTTTIGSRGTKAPPRHKRSERMEGAGKSMEDS  
VKRMEQFYEGSDGPPLRIVPIGGLGEIGMNCMLVGNFDRYLIDAGVMFPDYDELGVQKIIPD  
TTFIRWRHKIEAVIITHGHEDHIGALPWVIPALDHHTPIYASSFTMELIKKRLKENGIFVPSRLK  
VFKTKRKAAGPFEIEPIRVTHSIPDCCGLVLRCADGTILHTGDWKIDESPLDGKKFDRETLEEL  
SKEGVTLMMSDSTNILSPGRTISESVVADALLRRISAAGRIITTQFASNIHRLGSKAAADLTG  
RKMVFGMSLRTYLDAWKDGKAPIDPSTLVKVEDIDAYAPKDLLIVTTGSQAEPRAALNLAS  
YGSSEHALKLNKEDVILYSAKVIPGNESRVMKMMNRRISEIGSTIVIGKNELLHTSGHGYRGELEE  
VLKIVKPQHFLPIHGELLFLKEHELLGKSTGIQHTTVIKNGEMLVSHLRNRRVLSNGFVFLGK  
ENLQLMYNDGDKAFGTSTELCVDERMRIAATDGVVVSMEILRPQNADGLVENS�KGKIKITR  
CLWLDKGKLLDALHKAHAALSSCPVNCPLAHMERTVSEVLRKMVRKYSGRPEVIAVAME  
NPAAVLSDELNAKLSGNSHVGLGISALRKMADGHKKKIRVDRKQPDGNGYANLEKTSTQNSE  
VDGFEFERELSKEEETSSPSLAEGHSSDSENQDDFRKSFIPSPVNLVKSDEDLVPPWEHVNE  
LKEDGTISSDDDSLENQNSRSKGRPVKRNKWKPEEVKSLIKMRGELHSRFQVVRGRMALWE  
EISTNLMADGINHSPGQCKYLWTSLAKKYEESKSDKKSQKSWSYFEDMDNILSDSETMATK

>PtrGT48

MVSESDNGQETQELSRPNGVRKEQALDVEDDKTKTRHPRWTRQETFVLIESKKVVENRFQWSR  
RSTSALGSDQIESKWDVSSYCSQHGVNRGPVQCRKRWGNMLCDFKIKTWESQQMNETESF  
WMMRNELRRERKLPSFFDKEVYYVLDGRVITDAIPLSQITFKKQMDCIDRDEAATAEEEEEE  
HEYTEANLDSSQCARAEDGTTKKQNLGTRKRGSMREGKKRRLSSDESEDPDLEDRLIKVL  
GRNMSMLNSQLKAQNINCQLDREQRKDHNDLSLRALNKLTDAIVKIADKL

>PtrGT49

MDLLITGDRQIQNPNDPFLQITPFPPTGNFTIPTSAAAPSAAEAGSSEAASLPPQKLRPIRRTGRV  
PSSSREDGEESLRGLVSGQPSEVAAGGGGGSGGGLFDEFSLCSDGNDDDLVGVGESVGRK  
RKRKSKIEKFLESVMKVMKQEMHKQLVEMIESRERERVIRDEAWKQQEIERMKRDSEAR  
AQETSRNALISFIQNMSTSGHVIEVPQPSMTFESHMVNDGGNADAPIQNDFMGDQSNQRWPEAE  
VQALIMLQTAWEQSRVTGSKGTNIWDAISAGMYNMGYNRTAKKCKEKWENINKHFKMSLG  
TAPKKPFQNSTVSPYFPELDTLYNDDFVNLGNGSANTDNQANCALGKG

>PtrGT50

MGSGMLGLELPHQPENPQNPNHMNHPQVLAYTDHESDHRQHSQQSVKHAYPYASSTKPKQ  
LLSPLSDEDEPSFTGDDNTTDGKRKMSPWQRMKWTDHMVRLIMAVFYIGDDVGSESDPIG  
KKKPGGLAQKKGKWKSVSRAMMEKGFYVSPQQCEDKFNDLNKRYKRVNDILGKGTAACRVV  
ENQNLLDTMDLSPKMKEEVRKLLNSKHLFFREMCAYHNSCGHAPSWWAFGSNHSPEMATGPS  
PAHAQQHQRCSTENAVVNTSRTETEGSKMAKRINEEVEDEDDDDDDSDNDEDDCEDD  
GDEAIEGNSRHQNGHGQDEDNRDEKSSRKRPRKDVFSATSPLMQQLNGEIMNVLQDVAKSS  
WEKKHWMRLRLMQLEEQQVSYQCQAYELEKQRLKWVKFSSKKEREMEGVKLENERRLEN  
ERMVLIVRKKELLELDTQHQQQQQQQQQLPSNKRSDTSSIAG

>PtrGT51

MEGHLHHQHNNQHHLQYQLLQQQHHSVNVEASDKFPQWSIQETKEFLMIRAELDPTFMEK  
KRNKVLWEVISNKMKEKGYNRSAEQCKCKWKNLFTRYKGCETIEPEAMRQQPFYNELQAIF  
TSRMQRMLRAEAEGAATGLKKKAVKLSDDDEDKNEEIIIEGEGGSRKKIKKGAIGGTSSSGN  
SISLKELEDFTKQQIQMEMQWREVFEARENEMMKEMEWRTMKQLENDRIVMERRWRER  
EEQRRVREEARAERDALITALLNKLRRM

>PtrGT52

MEATQSITAINNKRKKGNQDCKNSNSRVLSTPRTRSQVSPWETAKQALILVNEIAAVEKDCS  
KAVSTNQKWKIIVGNCVALGVTHLSQCRSKWNSLVIEYNQIKKWDKESERSDFYWSLGCER  
RKEFGLPENFDDELFAIDYMWWSQEQQLDTPDLDLQKADLLDVIANLERYVEENHQTCT  
KEKPQTIPAEELHEIQVKEKPQKRLRKEKPQIGNGDEKPKIYSGRKKMPSTEDMEQMMVEKL  
SENAEMIQAVVNGNLPESADLEAADSNNIEGFKTDLIRSQGDKLIACLENIVNTMRQFPWLLQ  
DATS

>PtrGT53

MAGFFENTVKKVMDHQEMLHRKFLEVIERMDRERTDREETWRHQEAEKHNREAISRAHERA  
STSSREAQIVTYKERITGQSINLPIRMAPLLQPEISNEPIKEITSTKSDSHSRWPKDEVEALIKVR  
SRIEIKFQEPGVKGPLWEEVSSLMSSMGYQRS AKRCKEKWENINKYFRKAKESPERRSQRSKT  
CSYFNQLDQLYSRLINYPSTTYMPSRGIEFDIEKQGQPEVLEAFVKGKDHDLATITNPPGENIKG  
AEMGSSRFEFDGIADKNEELEEGLSSRIKFTKMISKRMANKEKMTVVVTKKMKIARA

>PtrGT54

MQPSNGGLSYIHSHHHQQRQQHSMEDDCCSPSVLQNLNHPCLSHLQQEQHKQPHQVFL  
QQHHQLFYFPFQQQQQEQSQGQTPQNPSLFTMSFKLGRNEGSGNRKASALNNQDEVAATP  
TLLDGNEHINPPHAILMPRS WHPLEDYTTIKEPFWKQLEKKRWGSEEEEEISGNRTRYFRPLEIEH  
VVDESRERCRNLDIKFPINLEAIYSLAKIAEANQTGSGSVLTGDHSPTNAGVSVSSATNRQN  
VGANGAANNVTGVDHGSSENSIGEEASLRKSQKRKRKRKLKEKLSYMAGFFENTVKKVMDHQ  
EMLHRKFLEVIERMDRERTDREETWRHQEAEKHNREAISRAHERASTSNREAQMVS YIERITG  
QSINLPIRMAPLLQPEISNEPIKEITSTKSDSHSRWPKDEVEALIKVRSRIEIKFQEPGVKGPLWE  
EVSSLMSSMGYQRS AKRCKEKWENINKYFRKAKESPERRSQRSKTCSYFNQLDQLYSSSLINY  
PSSTTYMPSRGIEFDIEKQGHSEVLEAFVKGKDHDLATITNPPGENIKGAEMSSSRFEFDGIAEKNE  
ELEEESSEQDKEVYKDDKQENGEQKDDGSGDEENEN

>PtrGT55

MDYIEDDPYPPKSYSLNRSKKHPLYPQRQTPTLHYN DYDYDYDYLDVDEDGDELDDFLD  
KNDSSYNPGGGYARKFQRNEEAFERYPKRQRLKNPVS NYEFAPRNPRLAYGDGNSAVEWSE  
HEKFVLLVWGDKFLQLGRNSLRSEDWVDVAEKVSETSKIERNEAQRQMMDVLKRRYKKE  
KAKGGNFSKWAYFNKMDMLMKQESGTVGGFSLACGVDSGEYVFM DTRVYLD RANMNDEM  
RDSPCESEEEEEEGGGSAGNDGMKGLRVLAEVQKFGIYGKIESSKREQMMELERMRIEF  
QMDLELQKKQILDRAQAEIAKIREEDDDEEDEDNSDDDDVSGGNISK

>PtrGT56

MEASTTFLENSAAAGDWEDEEGDEGMRVQAEQVQCSTANRWPKQETLALLEIRSDMDVAF  
RDSVVKAPLWEEVSRKLNELGYNRS AKKCKEKFENIYKYHRRTKGSQSGRPNGKTYRFFEQL  
QALDKTNALVSPTSSDKDHCLMPSASVIPVSFIPNDVPCSVQSPRMNCTDATSTSTASTSSESE  
GTRKKKRRLTDFFERLMKEVIEKQENLQNKFLAIEKCEQERIAREEVWKMQELDRIKREQEL  
LVHERAIAAAKDAAVLAFQKFSQGPVQLPDNPTVPMKFPDNQTSPALLSKNQAVPVENVV  
KTHENS SVESFVNMSSSRWPKEEIESLIKIRTYLEFYQENGPKGPLWEEISTSMKNLGYDRSA

KRCKEKWENMNKYFKRVKDSNKKRPGDSKTCPYFQQLDALYREKTRRVNPSYELKPEELL  
MHMMGGQEDQLPDSATTEDRESENVVDQIQVDYRGKEDGDGYGIVAIDPSSLEIME
